# Supplementary material for: Synthesis and Evaluation of the 4-Substituted 2-Hydroxy-5-Iodochalcones and Their 7-Substituted 6-Iodoflavonol Derivatives for Inhibitory Effect on Cholinesterases and β-Secretase
Source: PubMed Central journal article supplement (PMC6321475; doi:10.3390/ijms19124112), 2018-12-18
Supplement: ijms-19-04112-s001.pdf [file ijms-19-04112-s001.pdf]

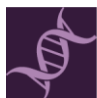

Supplementary Material

# Synthesis and evaluation of the 4-substituted 2-hydroxy-5-iodochalcones and their 7-substituted 6-iodoflavonol derivatives for inhibitory effect on cholinesterases and $\beta$ -secretase

M.J. Mphahlele; E.N. Agbo and S. Gildenhuis

$^1\text{H}$  and  $^{13}\text{C}$  NMR spectra of the prepared compounds (Figure S1),  $\text{IC}_{50}$  values of chalcones (**2h**, **2j**, **2n** & **2p**) and flavonols (**3b**, **3c**, **3l** & **3p**) against BACE-1 activity, docking poses of compounds **2a–p** and **3a–p** against the active site of AChE (Figure S2) and BChE (Figure S3), respectively.

Figure S1.  $^1\text{H}$ - and  $^{13}\text{C}$ -NMR spectra of compounds **1**, **2a–p** and **3a–p**.

Table S1:  $\text{IC}_{50}$  values for BACE-1 inhibitory effect of **2h**, **2j**, **2n**, **2p**, **3b**, **3c**, **3l**, **3p** & quercetin

Figure S2: Docking poses of compounds **2a–p** and **3a–p** against the active site of AChE

Figures S3: Docking poses of compounds **2a–p** and **3a–p** against the active site of BChE

Figure S4: Docking poses of **2p**, **3b** and **3p** into BACE-1

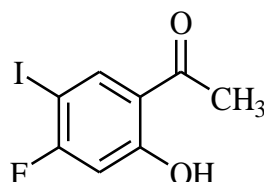

Figure S1.  $^1\text{H}$  and  $^{13}\text{C}$  NMR spectra of compounds **1a–d**, **2a–p** and **3a–p**.

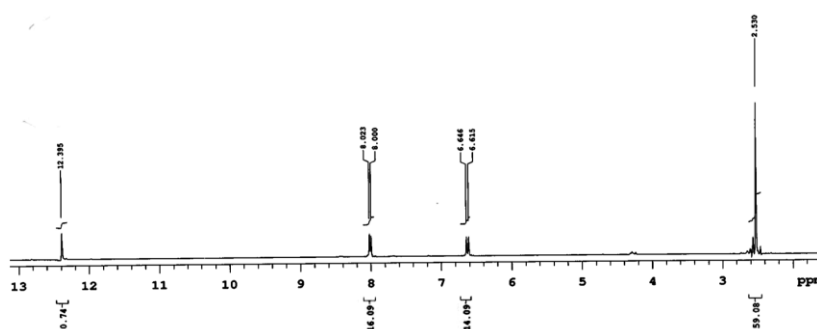

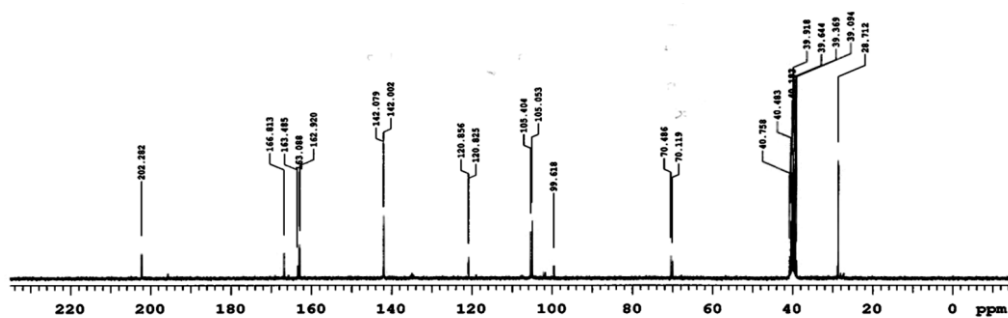

Figure S1.1.  $^1\text{H}$ - and  $^{13}\text{C}$ -NMR spectra of **1a** in  $\text{CDCl}_3$  at 300 and 75 MHz, respectively.

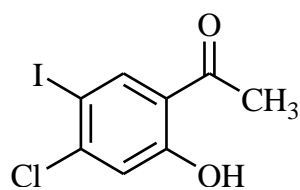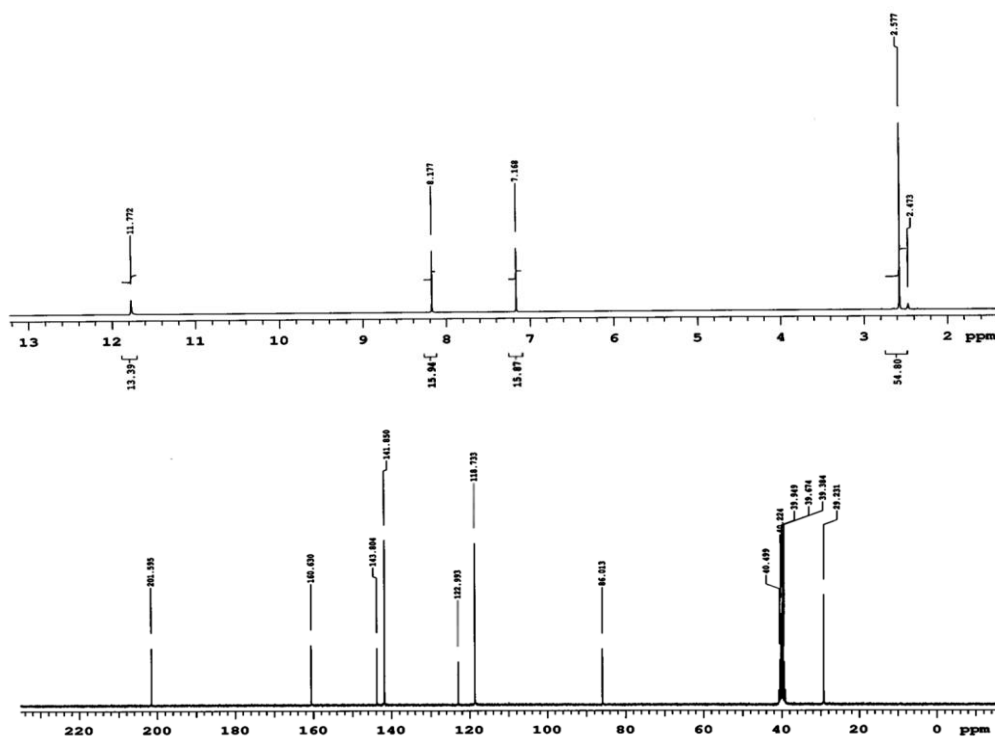

Figure S1.2.  $^1\text{H}$ - and  $^{13}\text{C}$ -NMR spectra of **1b** in  $\text{CDCl}_3$  at 300 and 75 MHz, respectively.

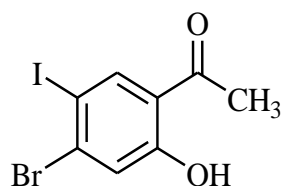

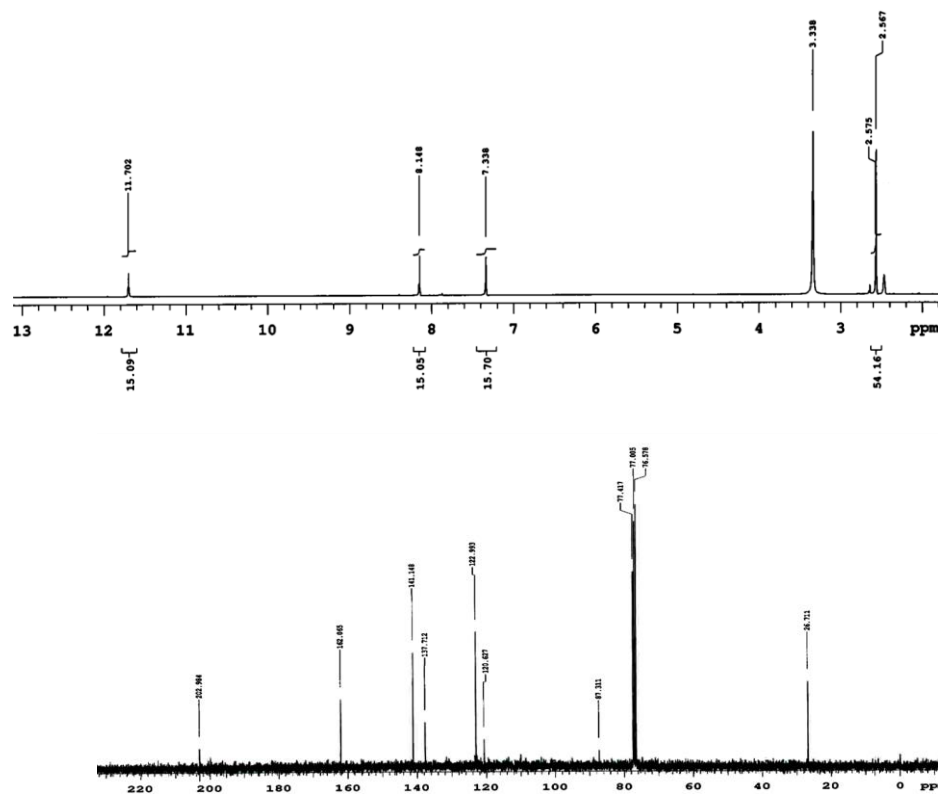

Figure S1.3.  $^1\text{H}$ - and  $^{13}\text{C}$ -NMR spectra of **1c** in  $\text{CDCl}_3$  at 300 and 75 MHz, respectively.

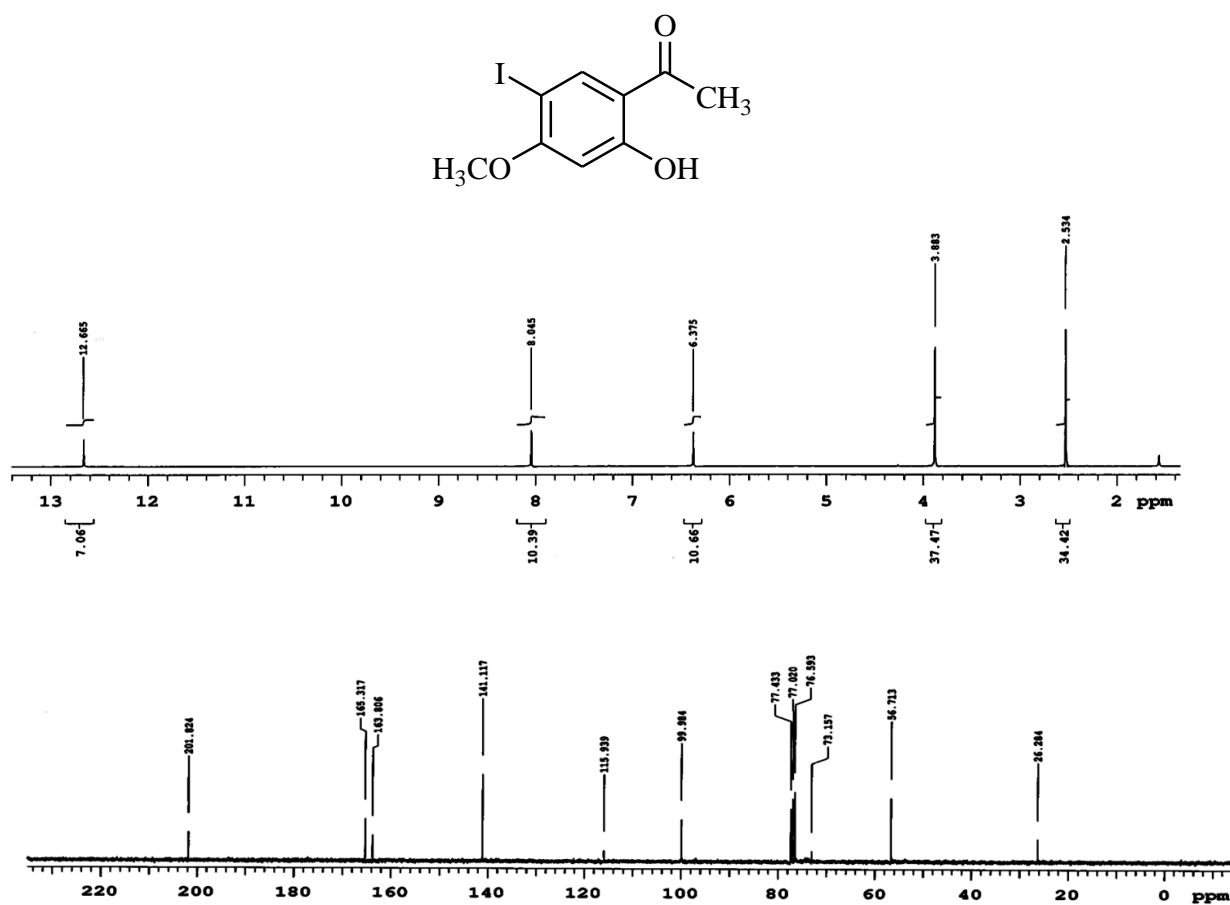

Figure S1.4.  $^1\text{H}$ - and  $^{13}\text{C}$ -NMR spectra of **1d** in  $\text{CDCl}_3$  at 300 and 75 MHz, respectively.

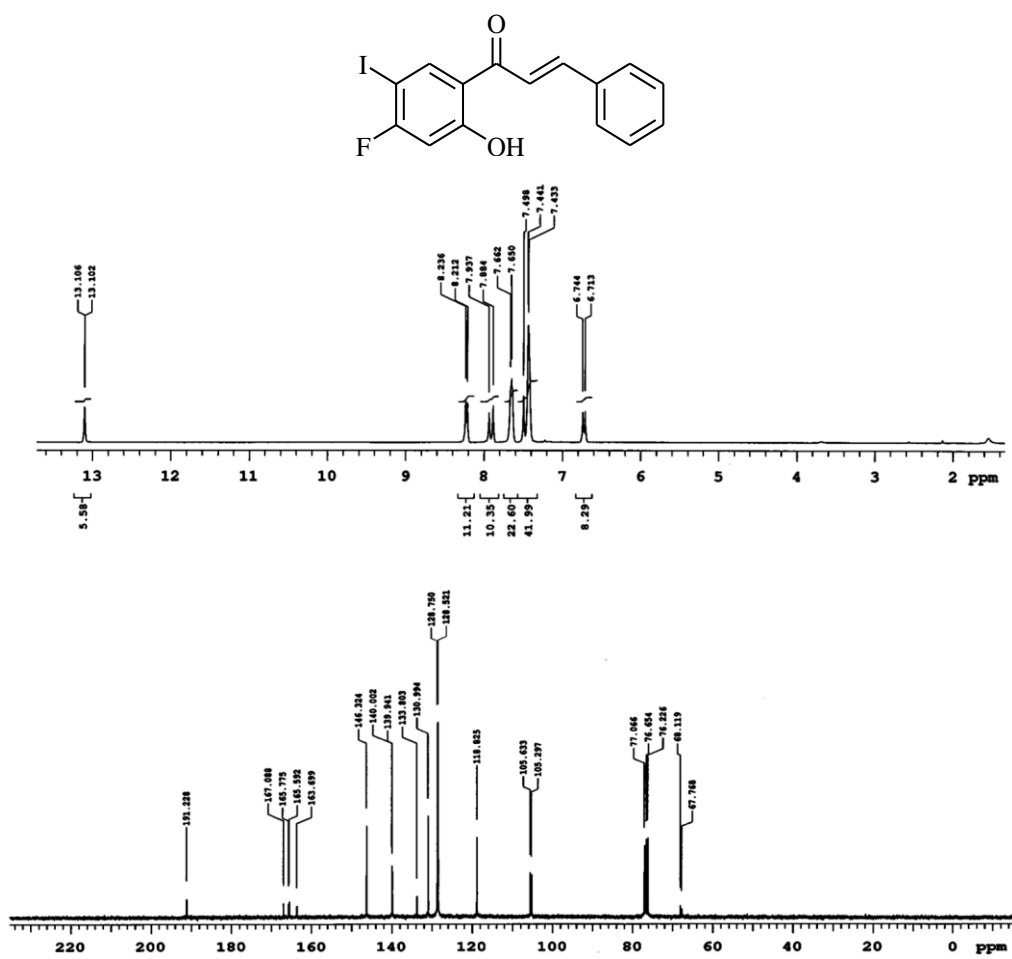

Figure S1.5. <sup>1</sup>H- and <sup>13</sup>C-NMR spectra of 2a in DMSO-*d*<sub>6</sub> at 500 and 125 MHz, respectively.

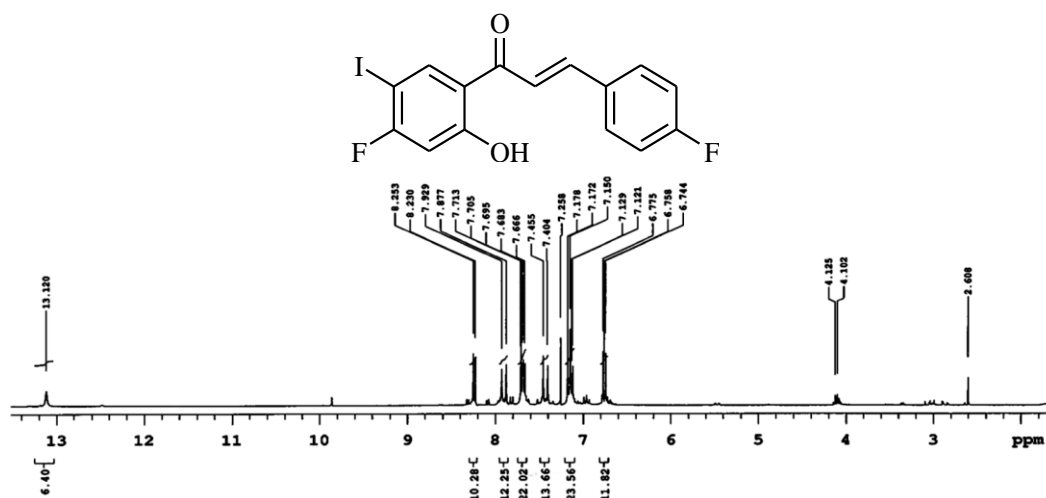

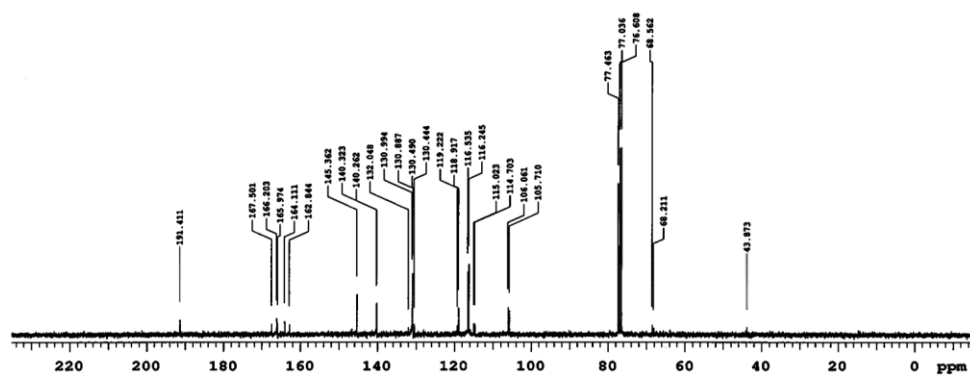

Figure S1.6. <sup>1</sup>H- and <sup>13</sup>C-NMR spectra of 2b in DMSO-*d*<sub>6</sub> at 500 and 125 MHz, respectively.

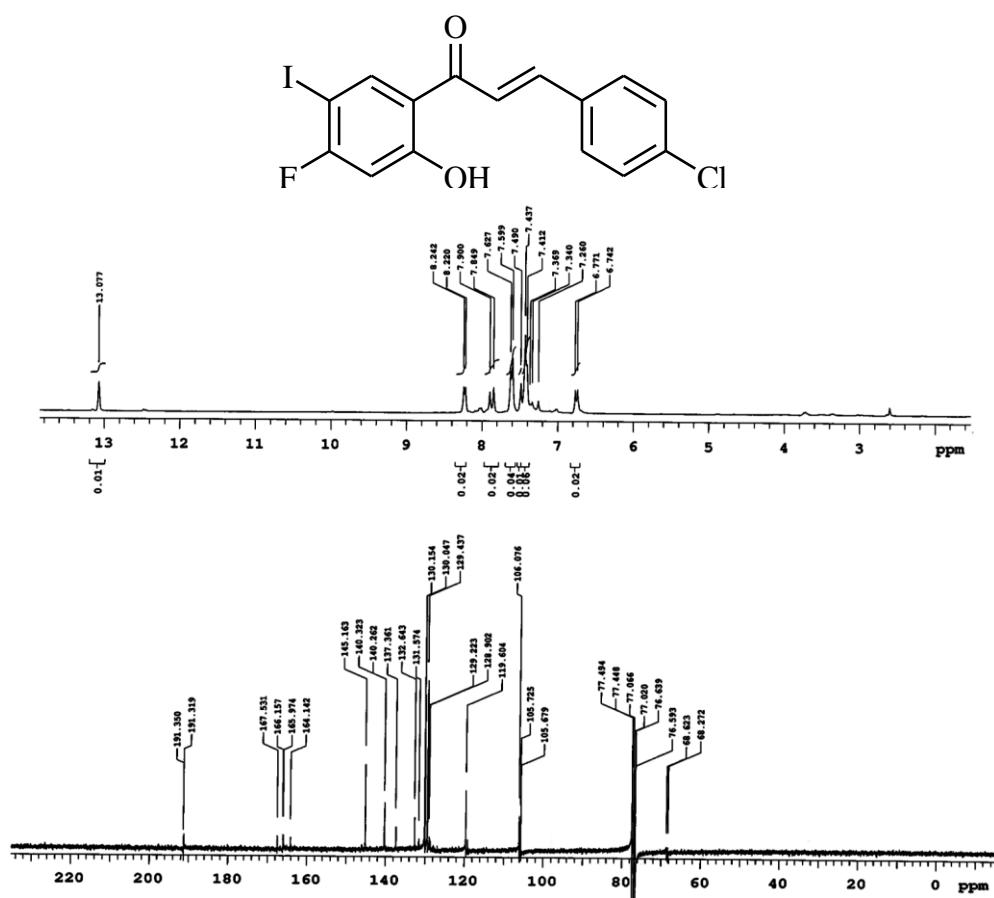

Figure S1.7. <sup>1</sup>H- and <sup>13</sup>C-NMR spectra of 2c in DMSO-*d*<sub>6</sub> at 500 and 125 MHz, respectively.

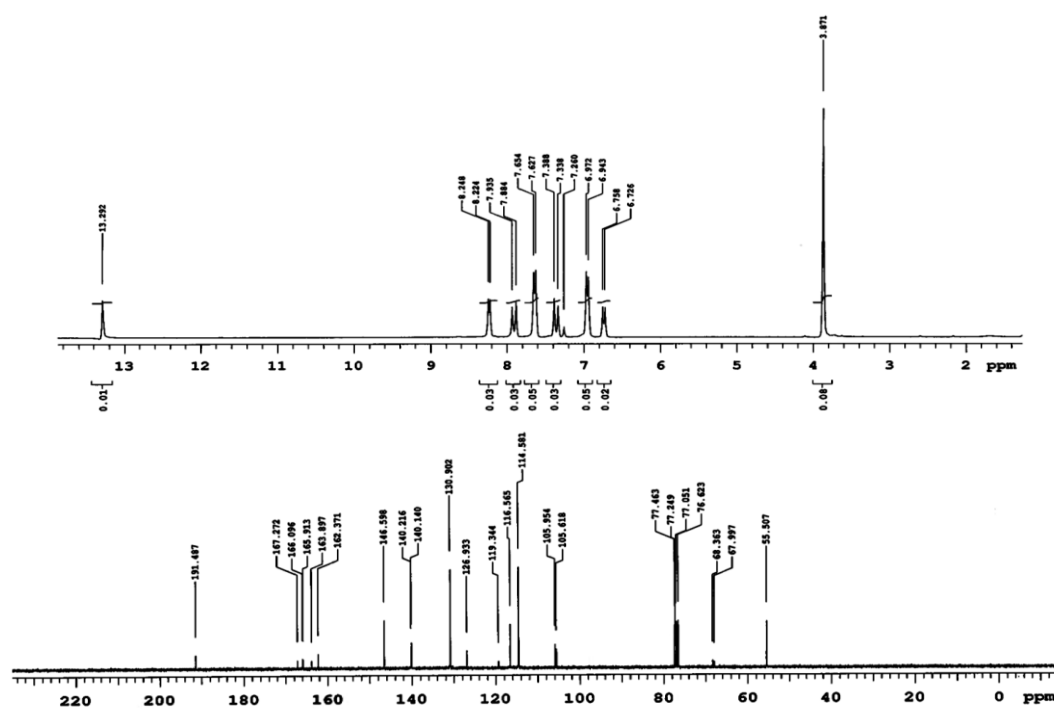

Figure S1.8.  $^1\text{H}$ - and  $^{13}\text{C}$ -NMR spectra of **2d** in  $\text{DMSO-}d_6$  at 500 and 125 MHz, respectively.

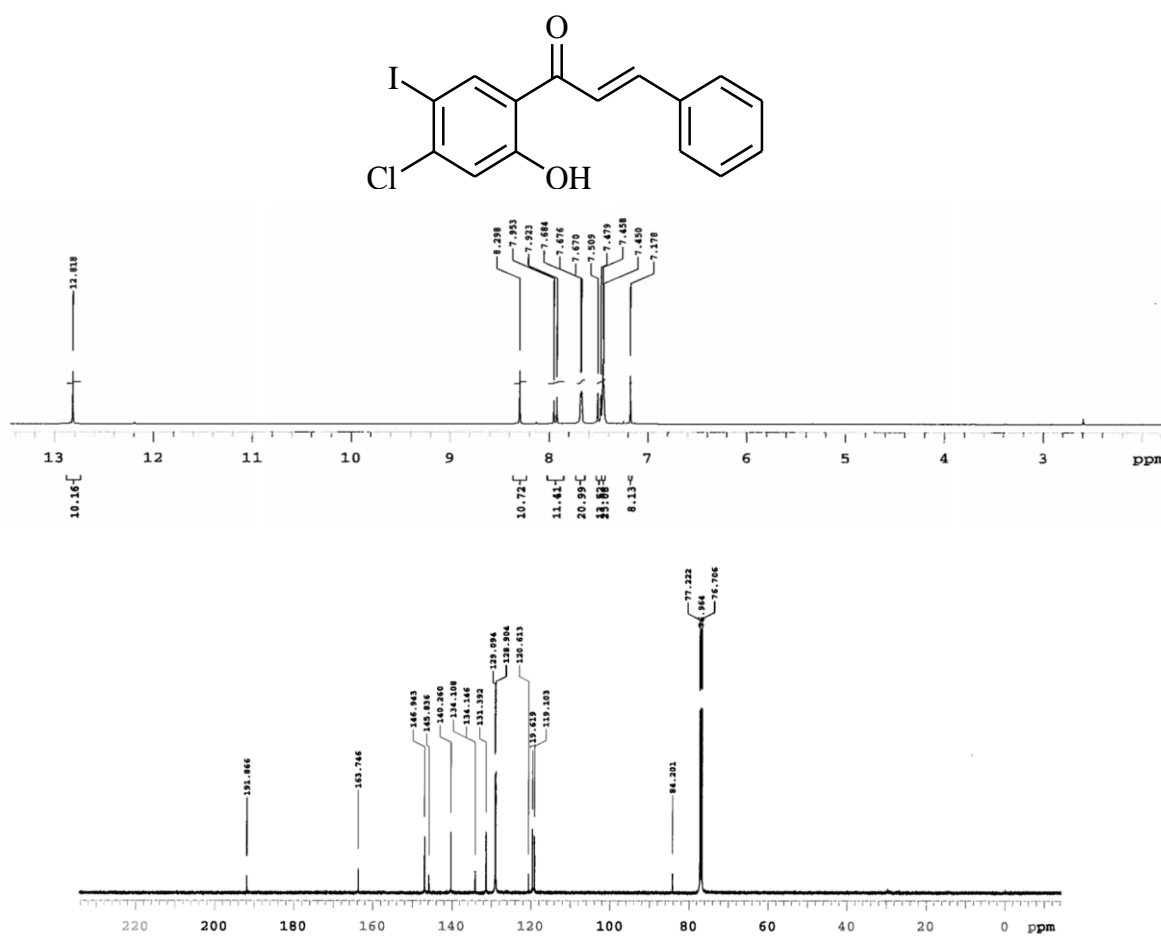

Figure S1.9.  $^1\text{H}$ - and  $^{13}\text{C}$ -NMR spectra of **2e** in  $\text{DMSO-}d_6$  at 500 and 125 MHz, respectively.

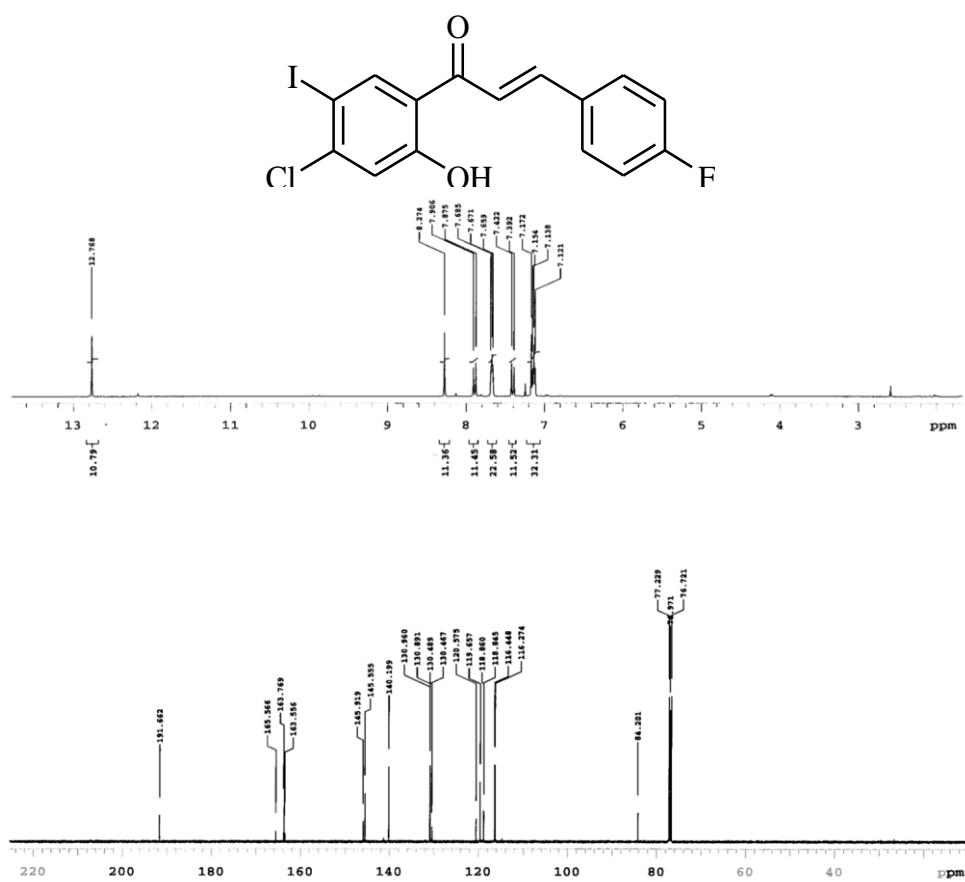

**Figure S1.10:** <sup>1</sup>H- and <sup>13</sup>C-NMR spectra of **2f** in DMSO-*d*<sub>6</sub> at 500 and 125 MHz, respectively.

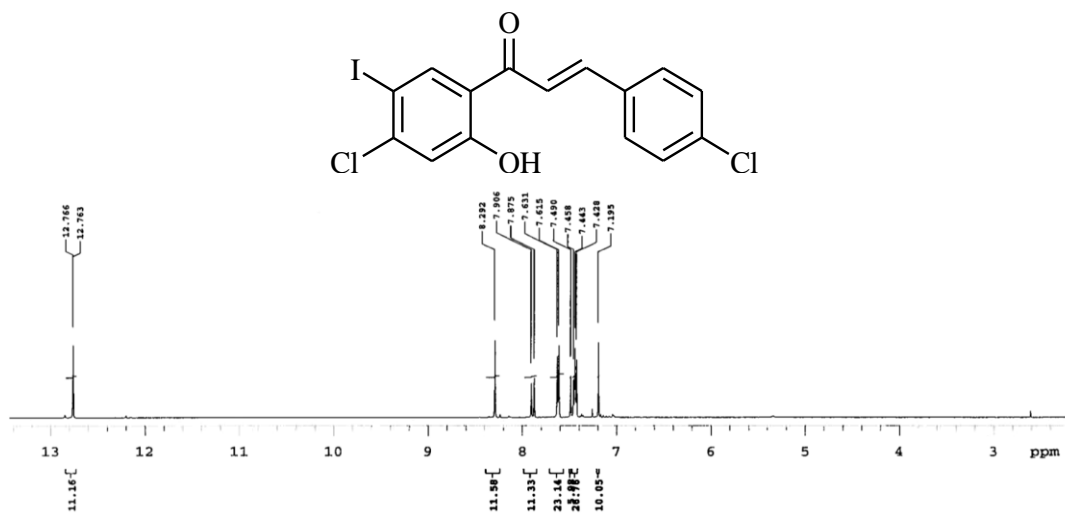

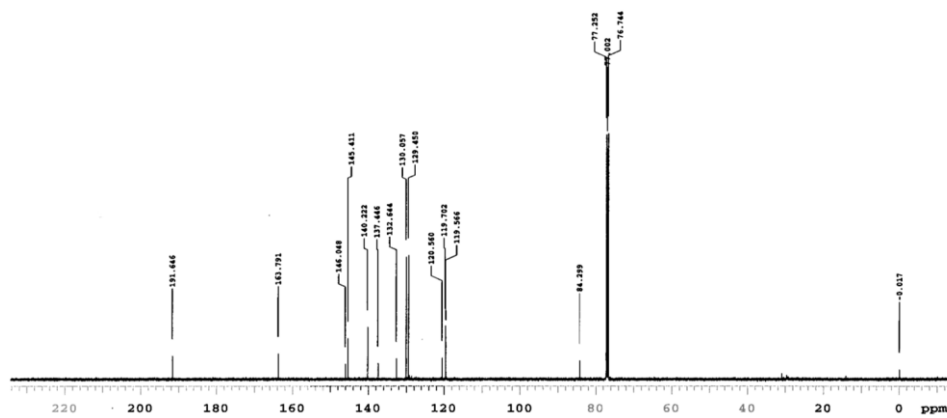

Figure S1.11:  $^1\text{H}$ - and  $^{13}\text{C}$ -NMR spectra of **2g** in  $\text{DMSO-}d_6$  at 500 and 125 MHz, respectively.

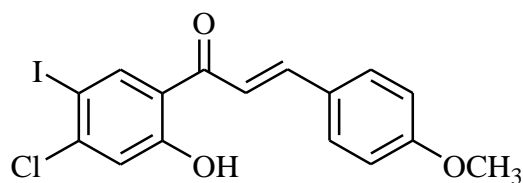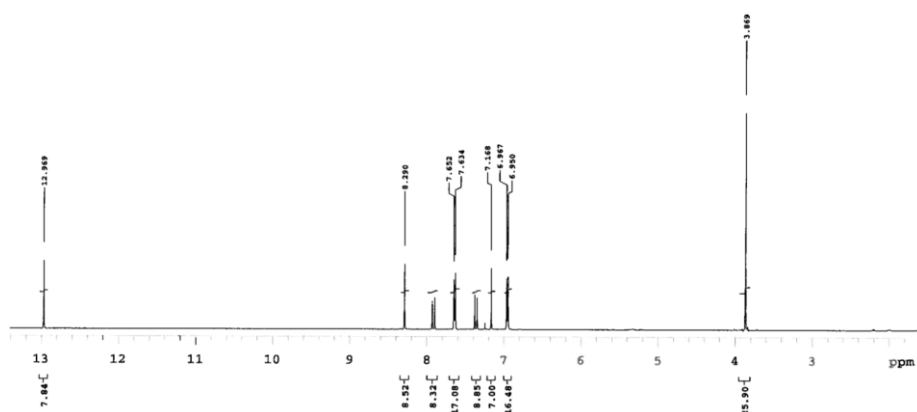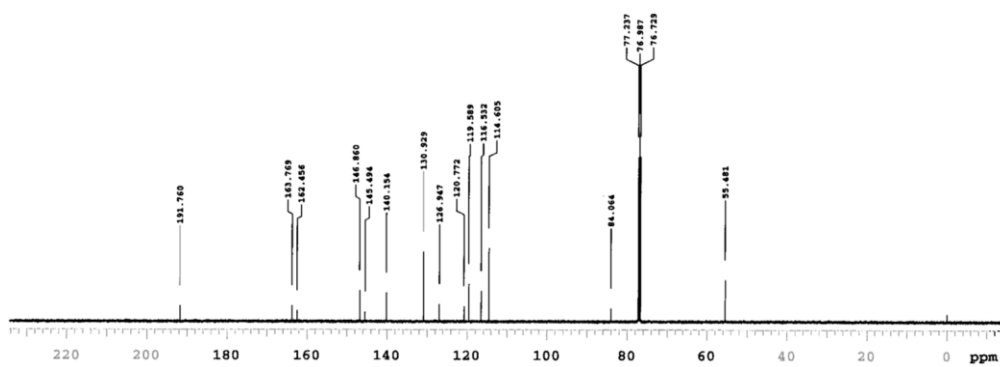

Figure S1.12:  $^1\text{H}$ - and  $^{13}\text{C}$ -NMR spectra of **2h** in  $\text{DMSO-}d_6$  at 500 and 125 MHz, respectively.

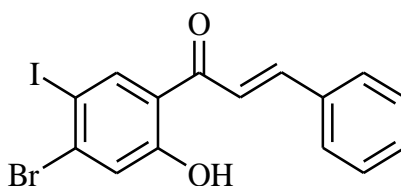





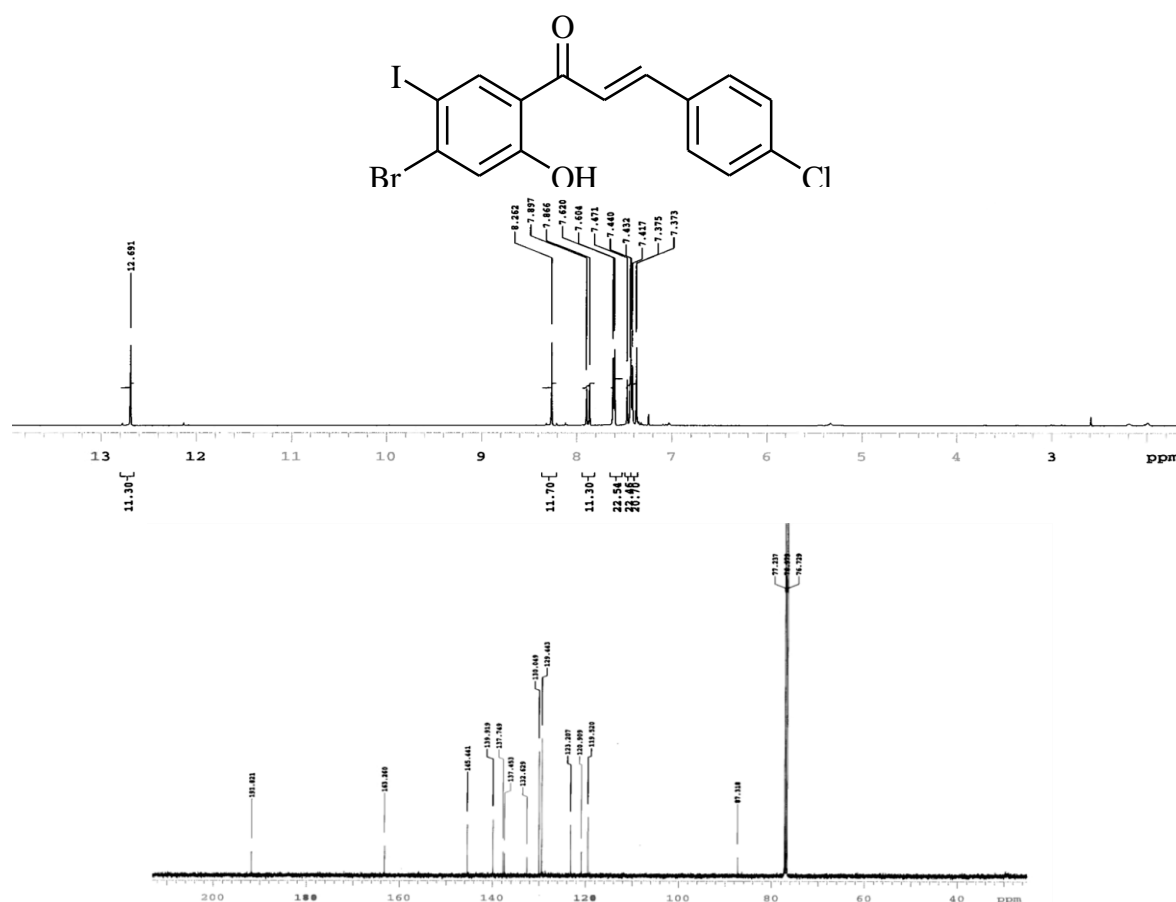

Figure S1.15:  $^1\text{H}$ - and  $^{13}\text{C}$ -NMR spectra of **2k** in  $\text{DMSO}-d_6$  at 500 and 125 MHz, respectively.

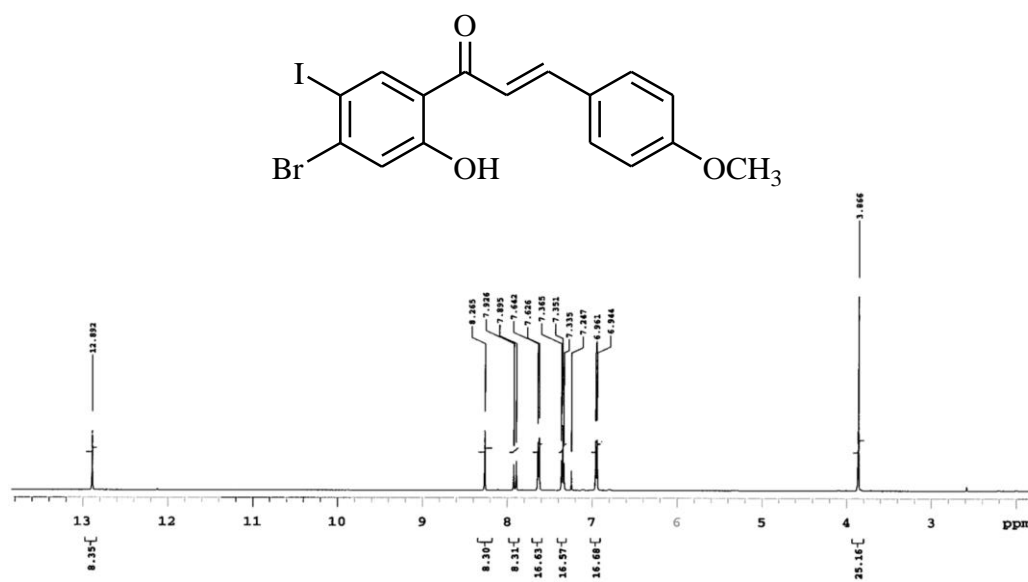

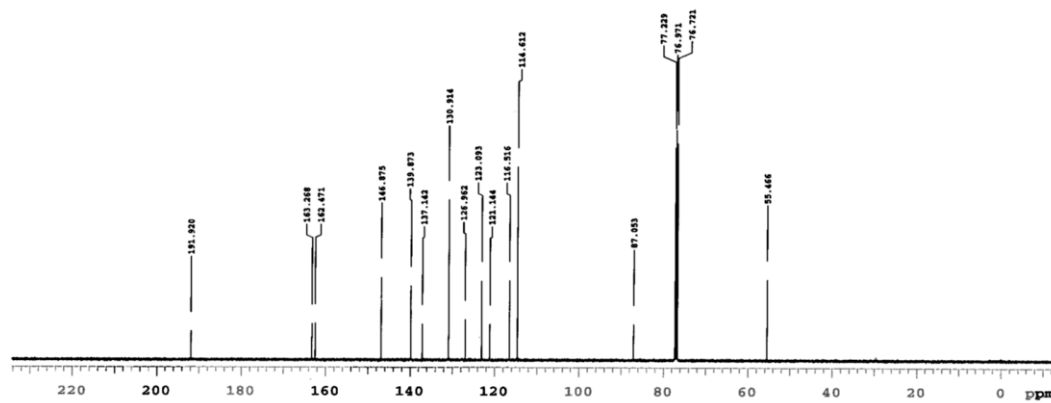

Figure S1.16:  $^1\text{H}$ - and  $^{13}\text{C}$ -NMR spectra of **2l** in  $\text{DMSO-}d_6$  at 500 and 125 MHz, respectively.

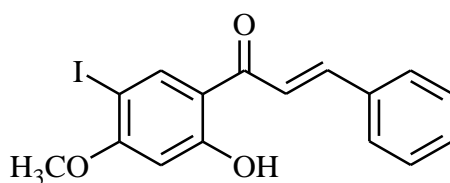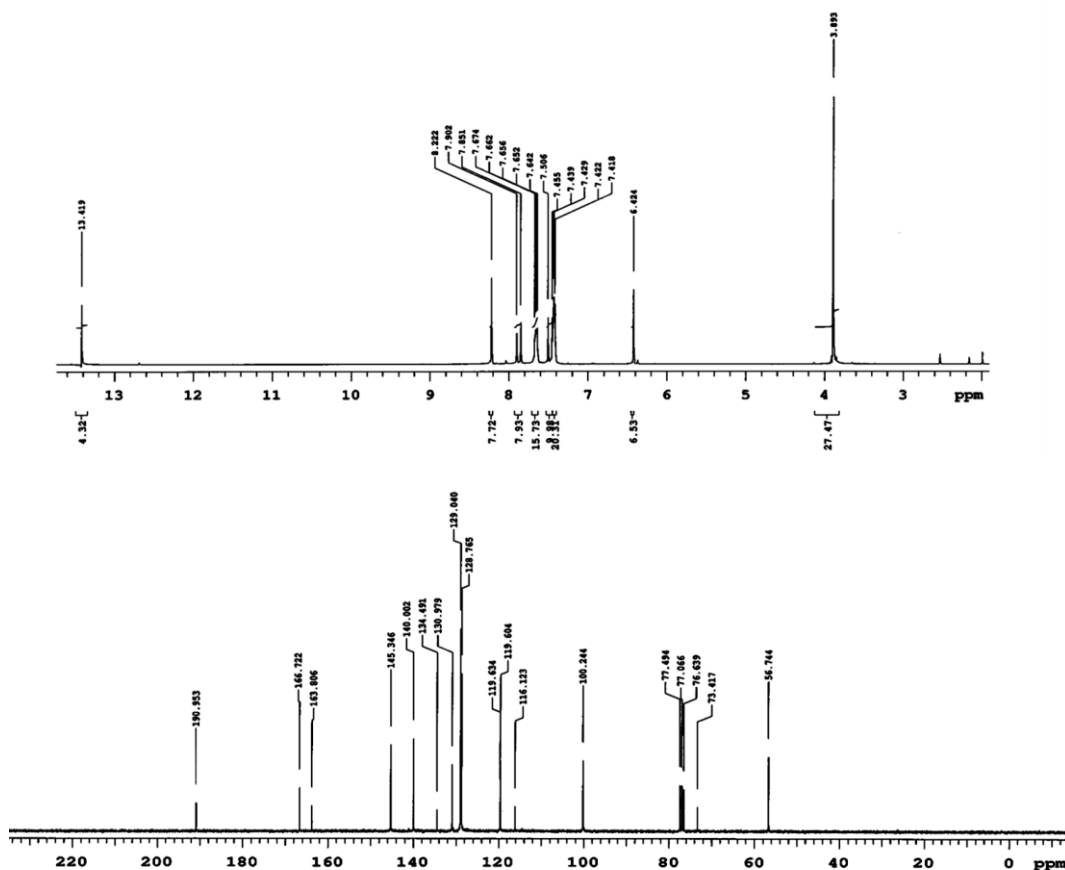

Figure S1.17:  $^1\text{H}$ - and  $^{13}\text{C}$ -NMR spectra of **2m** in  $\text{DMSO-}d_6$  at 500 and 125 MHz, respectively.

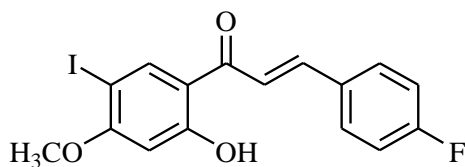

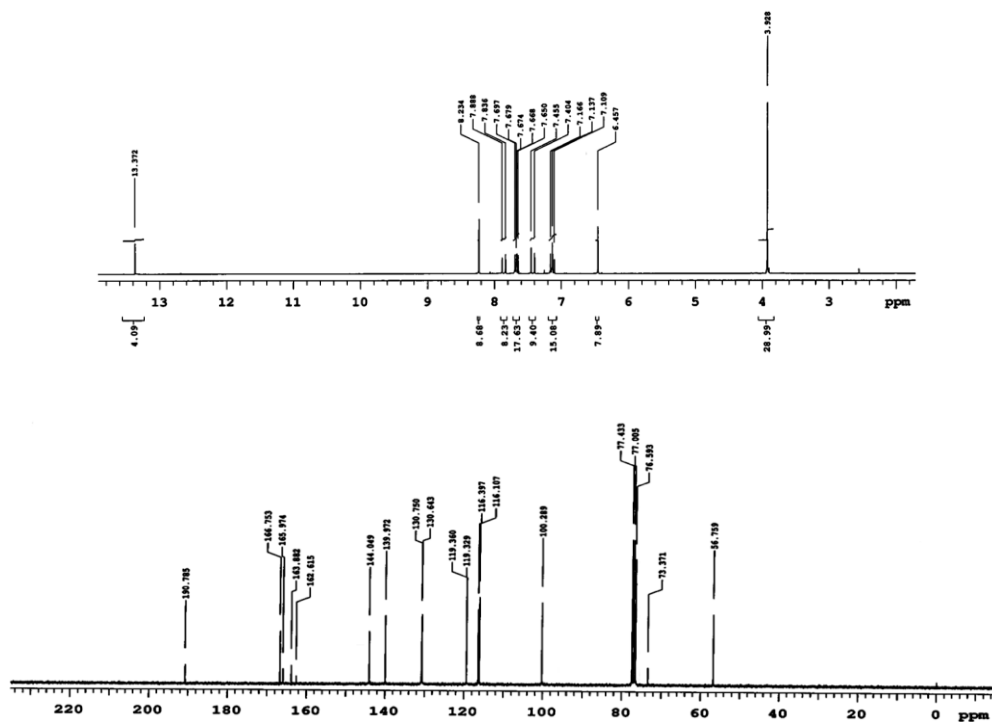

Figure S1.18: <sup>1</sup>H- and <sup>13</sup>C-NMR spectra of **2n** in DMSO-*d*<sub>6</sub> at 500 and 125 MHz, respectively.

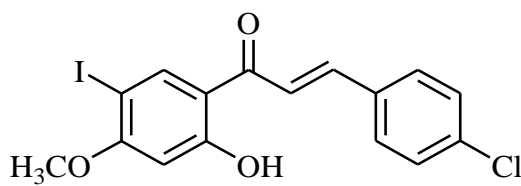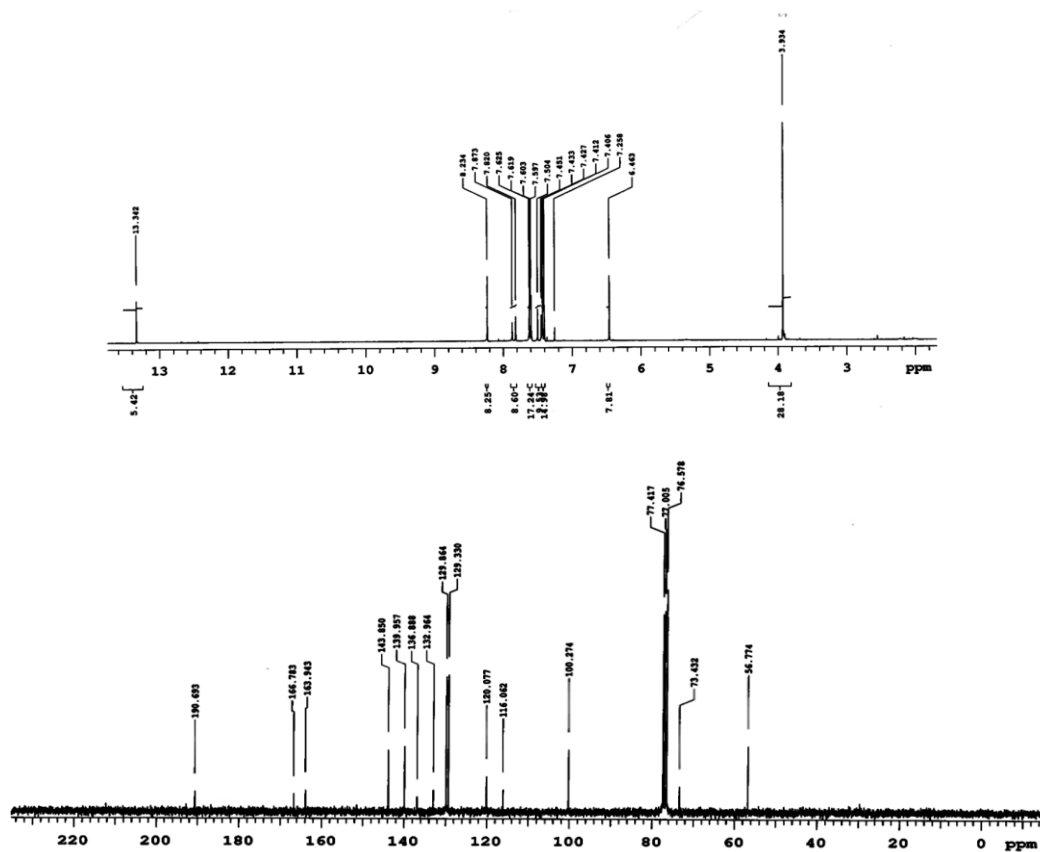

**Figure S1.19:**  $^1\text{H}$ - and  $^{13}\text{C}$ -NMR spectra of **2o** in  $\text{DMSO-}d_6$  at 500 and 125 MHz, respectively.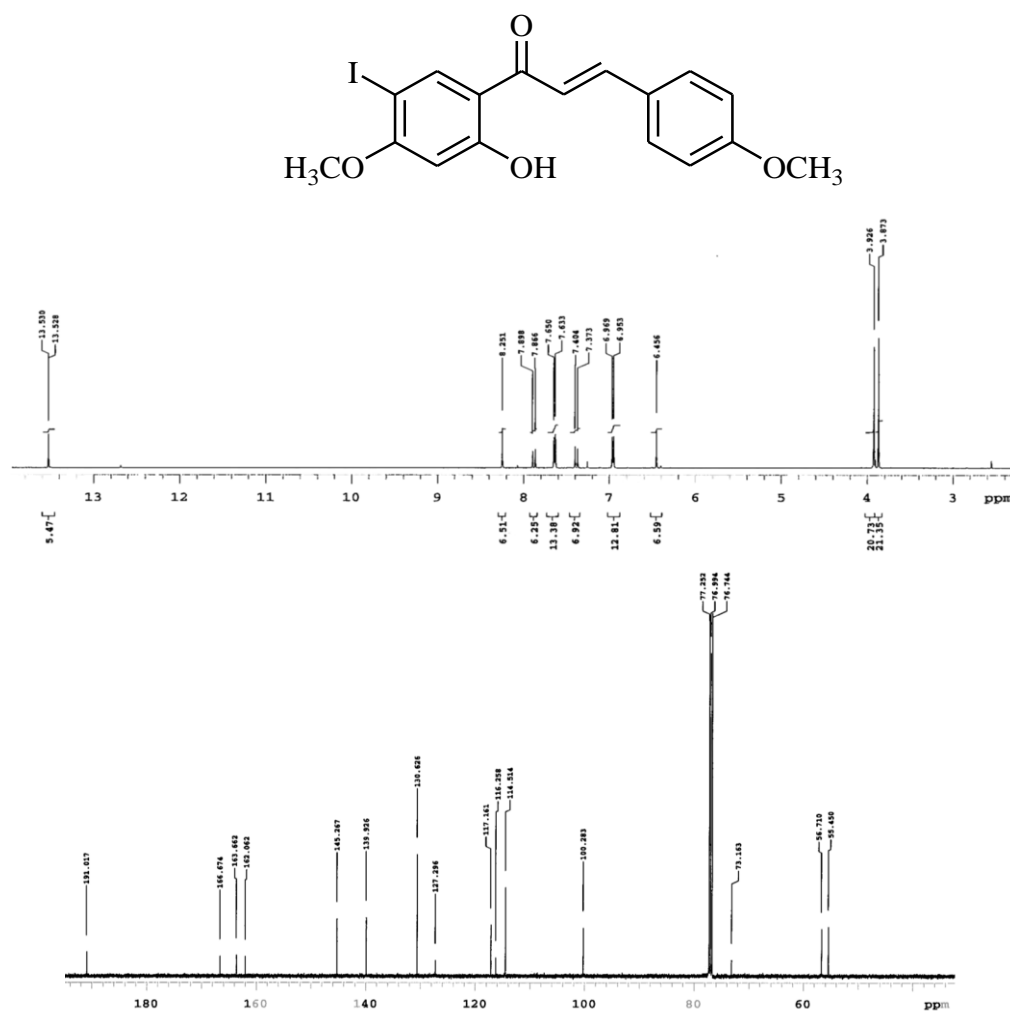**Figure S1.20:**  $^1\text{H}$ - and  $^{13}\text{C}$ -NMR spectra of **2p** in  $\text{DMSO-}d_6$  at 500 and 125 MHz, respectively.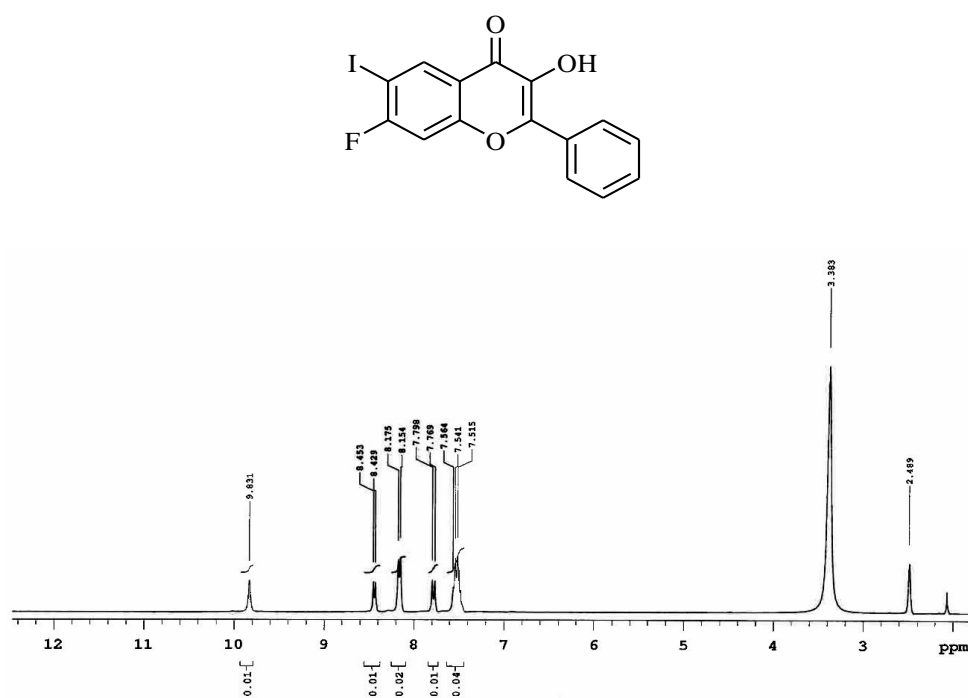

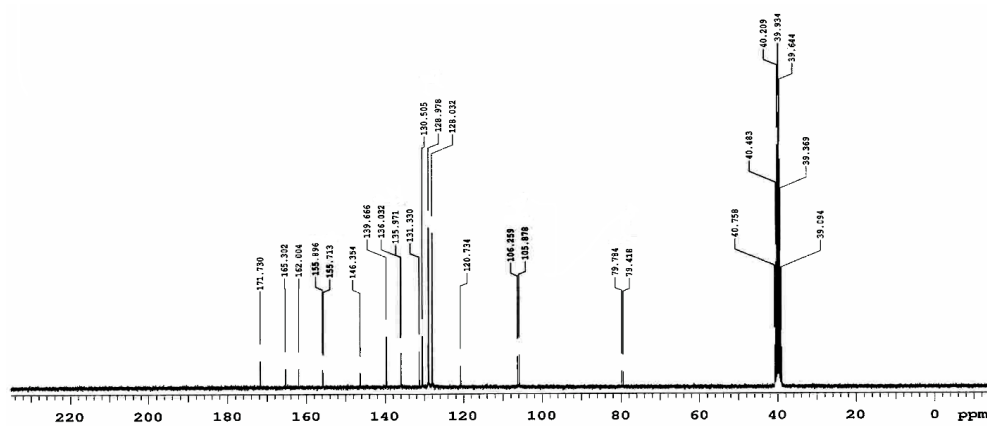

Figure S1.21:  $^1\text{H}$ - and  $^{13}\text{C}$ -NMR spectra of **3a** in  $\text{DMSO-}d_6$  at 500 and 125 MHz, respectively.

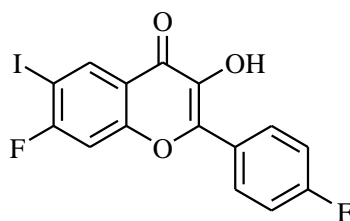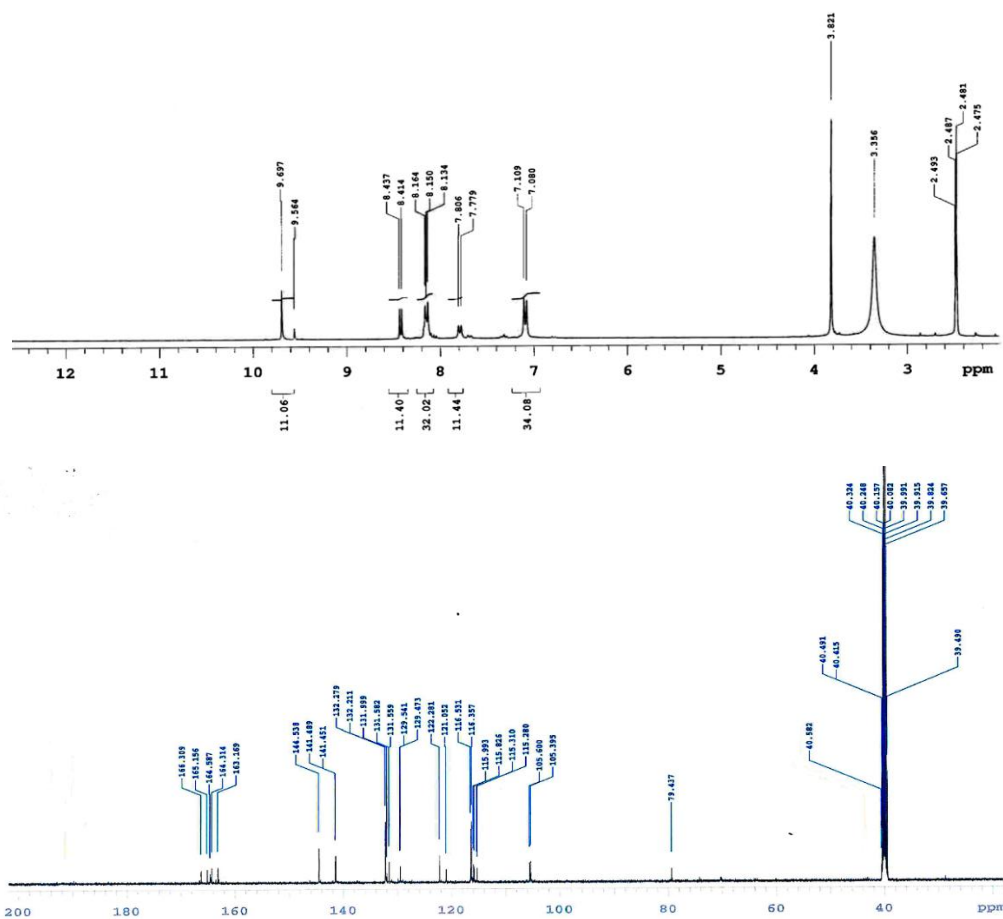

Figure S1.22:  $^1\text{H}$ - and  $^{13}\text{C}$ -NMR spectra of **3b** in  $\text{DMSO-}d_6$  at 500 and 125 MHz, respectively.

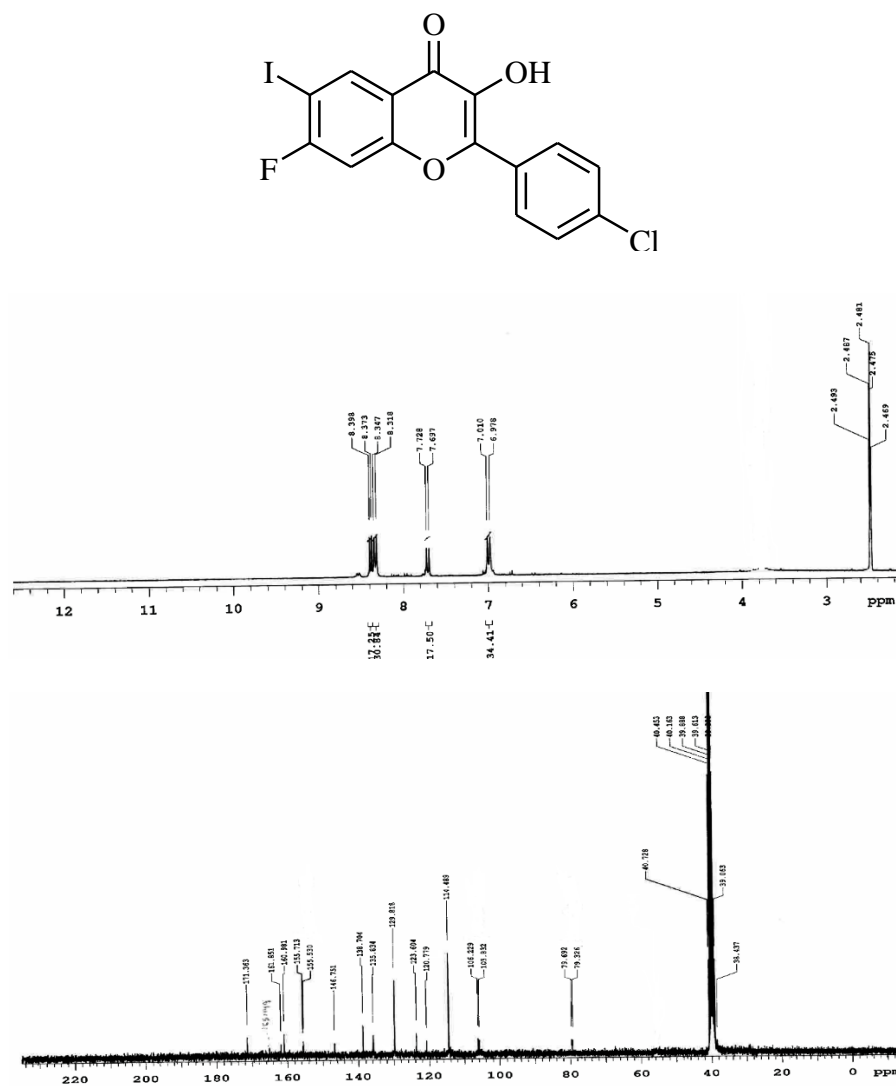

Figure S1.23: <sup>1</sup>H- and <sup>13</sup>C-NMR spectra of **3c** in DMSO-*d*<sub>6</sub> at 500 and 125 MHz, respectively.

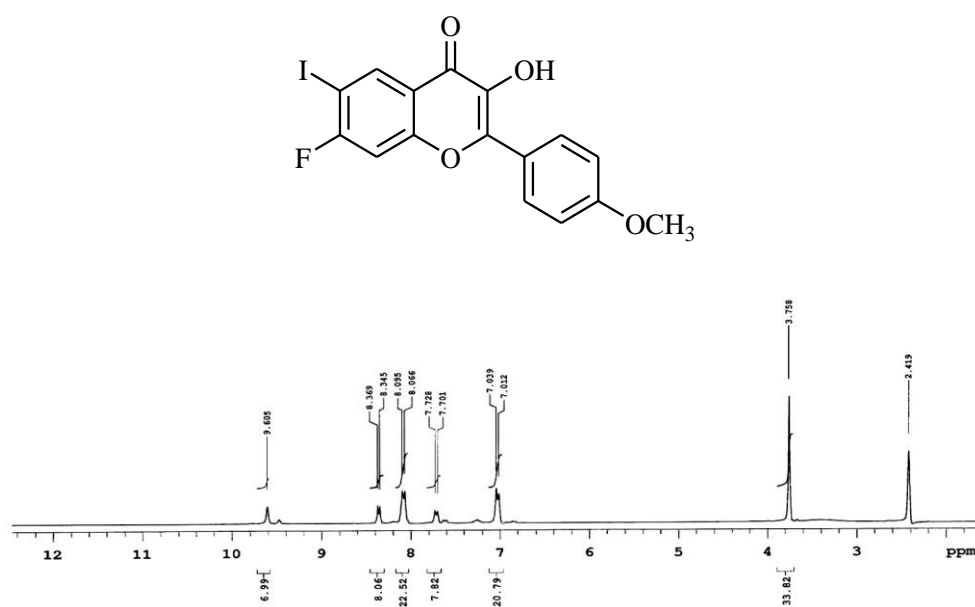

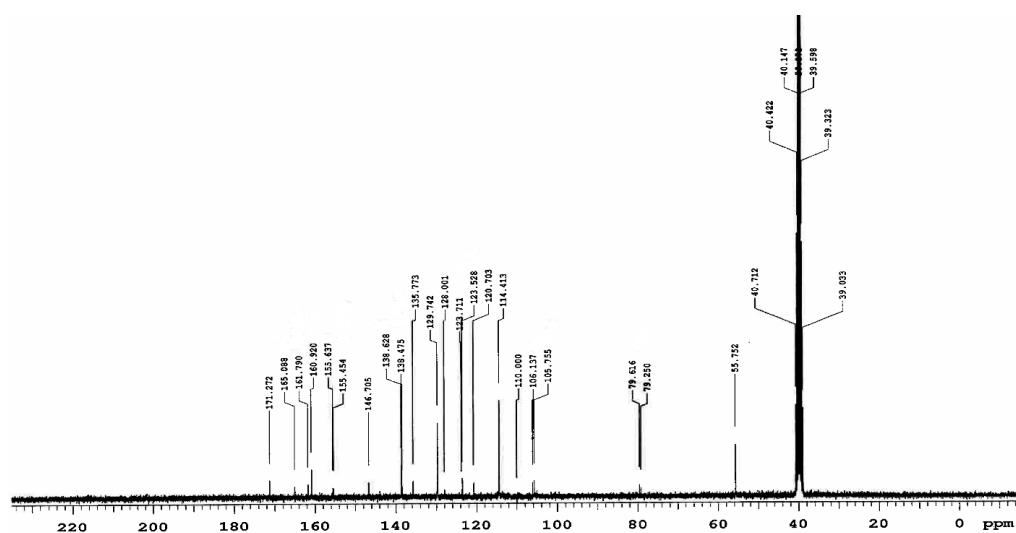

Figure S1.24:  $^1\text{H}$ - and  $^{13}\text{C}$ -NMR spectra of 3d in  $\text{DMSO-}d_6$  at 500 and 125 MHz, respectively.

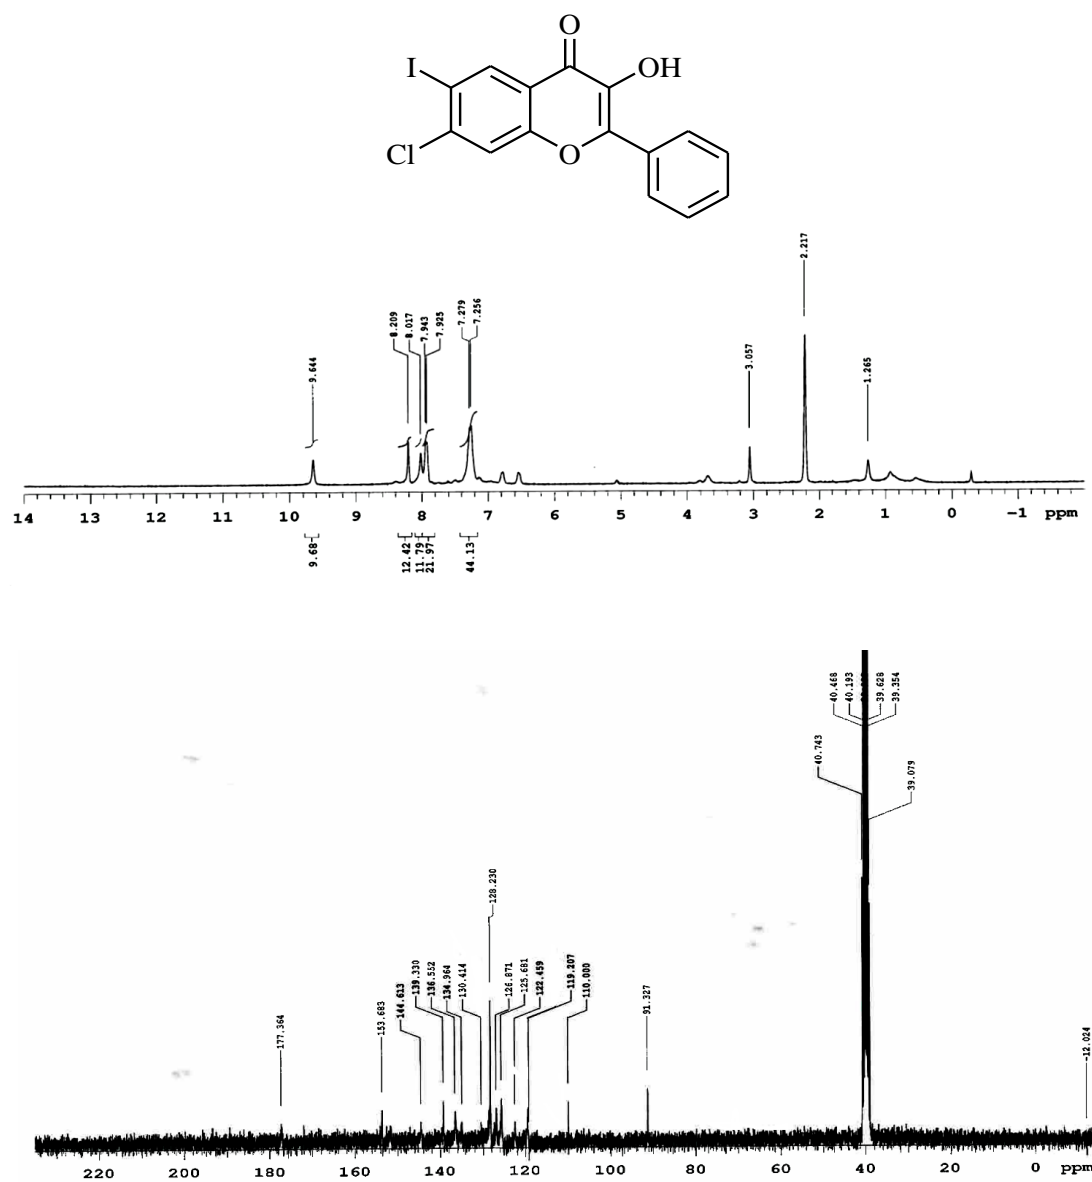

Figure S1.25:  $^1\text{H}$ - and  $^{13}\text{C}$ -NMR spectra of 3e in  $\text{DMSO-}d_6$  at 500 and 125 MHz, respectively.



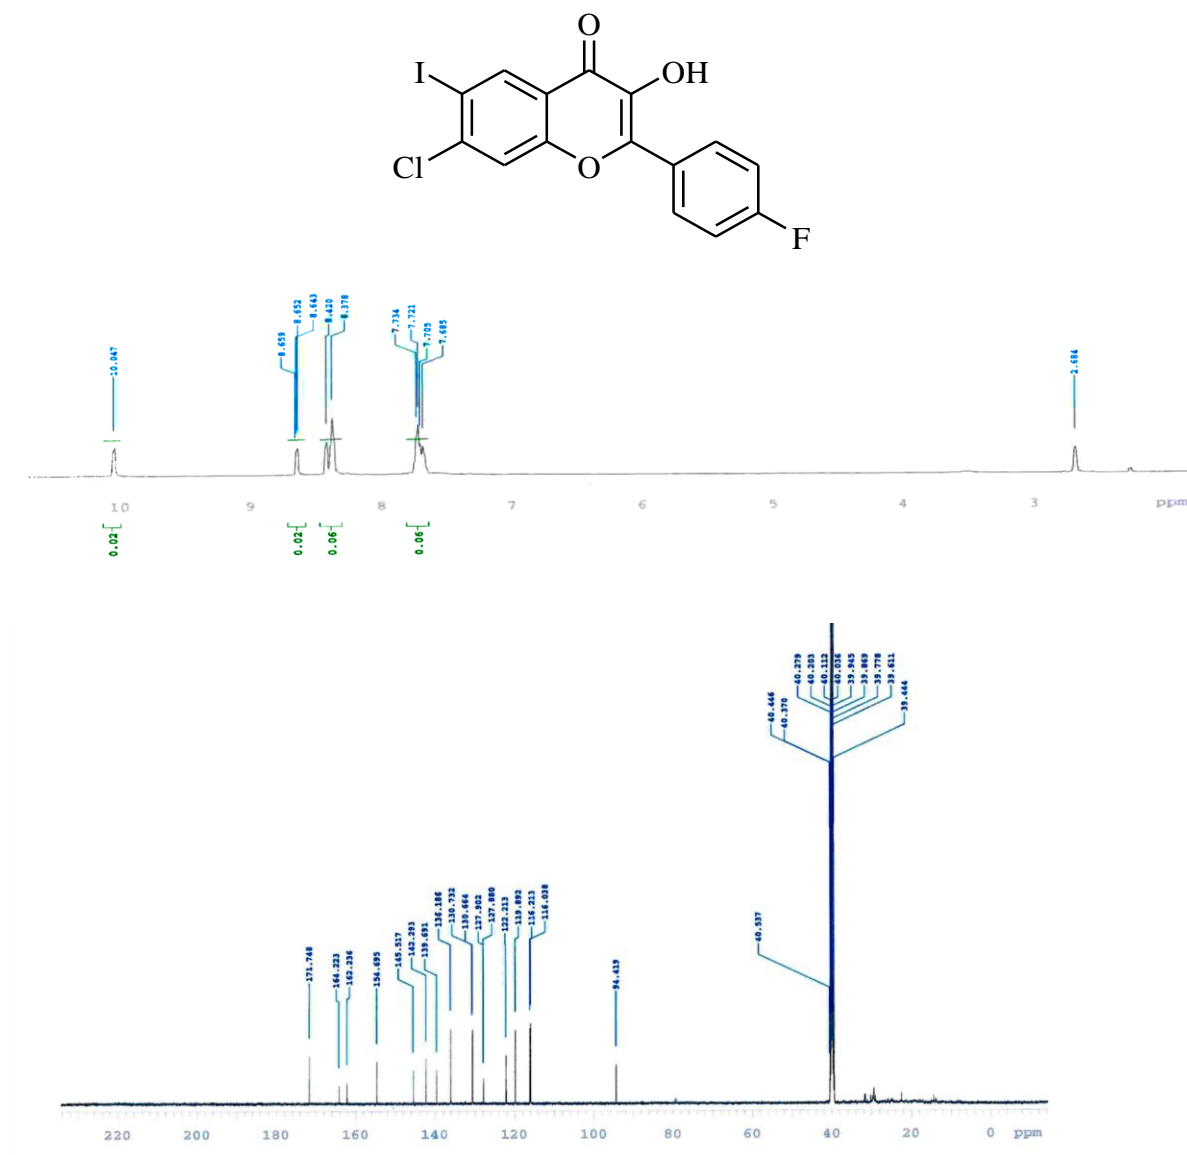

**Figure S1.26:**  $^1\text{H-}$  and  $^{13}\text{C-NMR}$  spectra of **3f** in  $\text{DMSO-}d_6$  at 500 and 125 MHz, respectively.

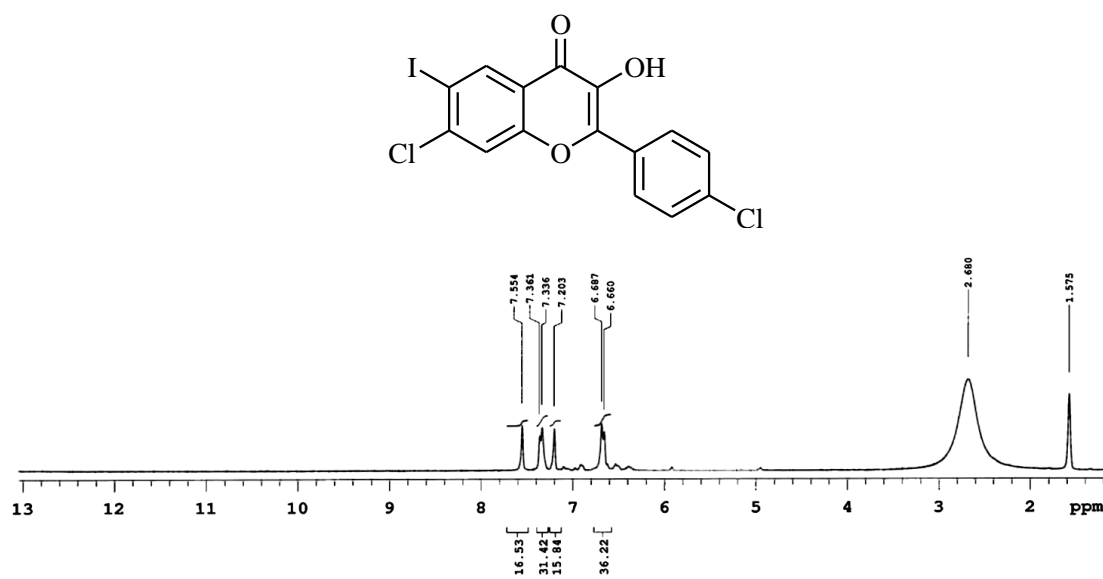

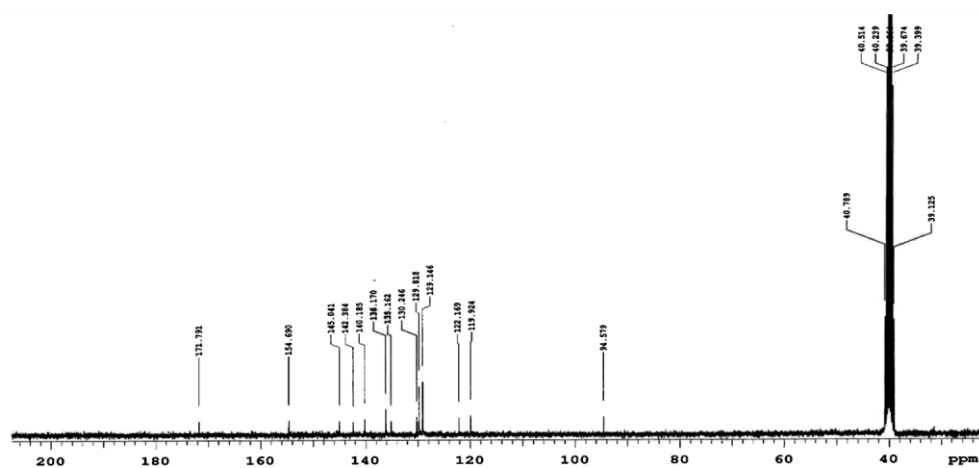

Figure S1.27:  $^1\text{H}$ - and  $^{13}\text{C}$ -NMR spectra of 3g in  $\text{DMSO-}d_6$  at 500 and 125 MHz, respectively.

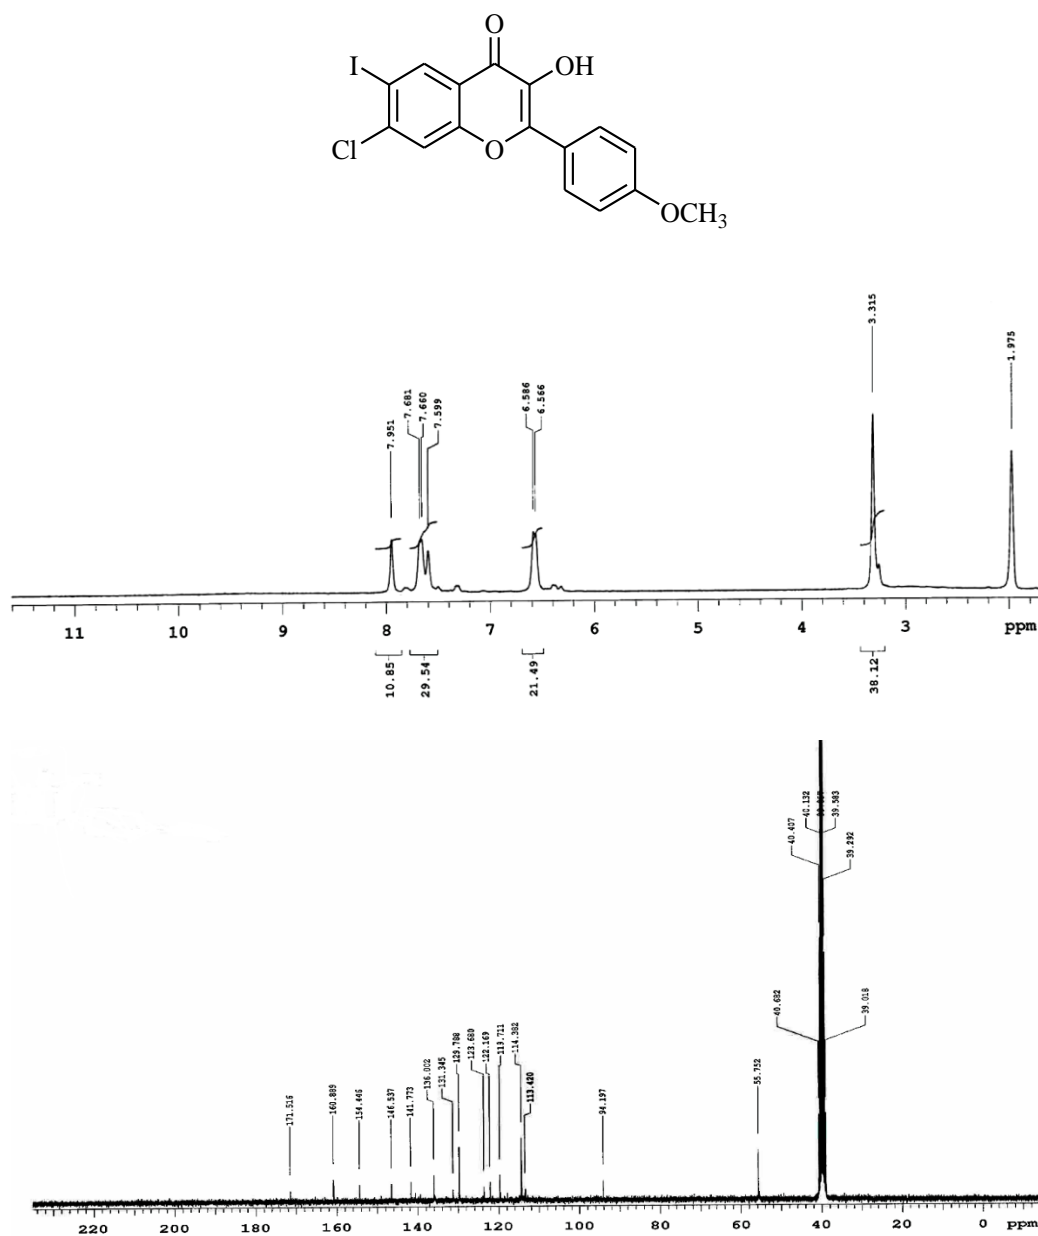

Figure S1.28:  $^1\text{H}$ - and  $^{13}\text{C}$ -NMR spectra of 3h in  $\text{DMSO-}d_6$  at 500 and 125 MHz, respectively.

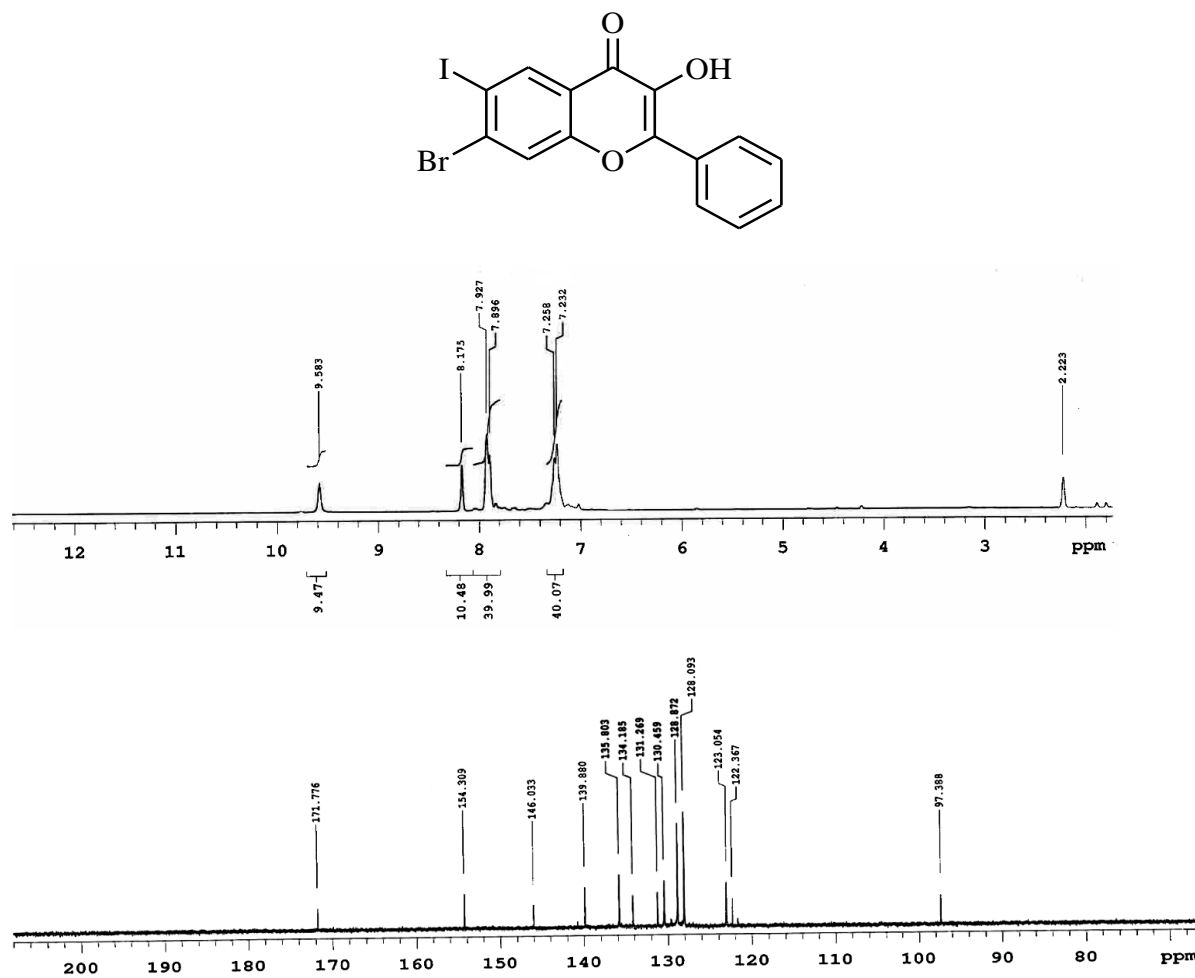

Figure S1.29: <sup>1</sup>H- and <sup>13</sup>C-NMR spectra of 3i in DMSO-*d*<sub>6</sub> at 500 and 125 MHz, respectively.

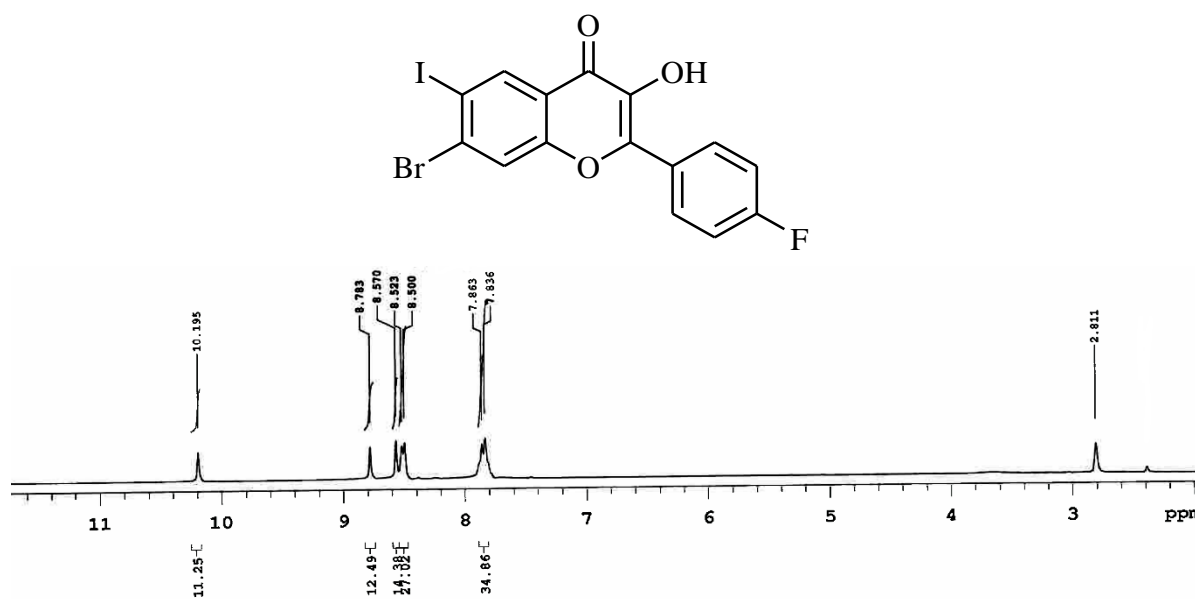

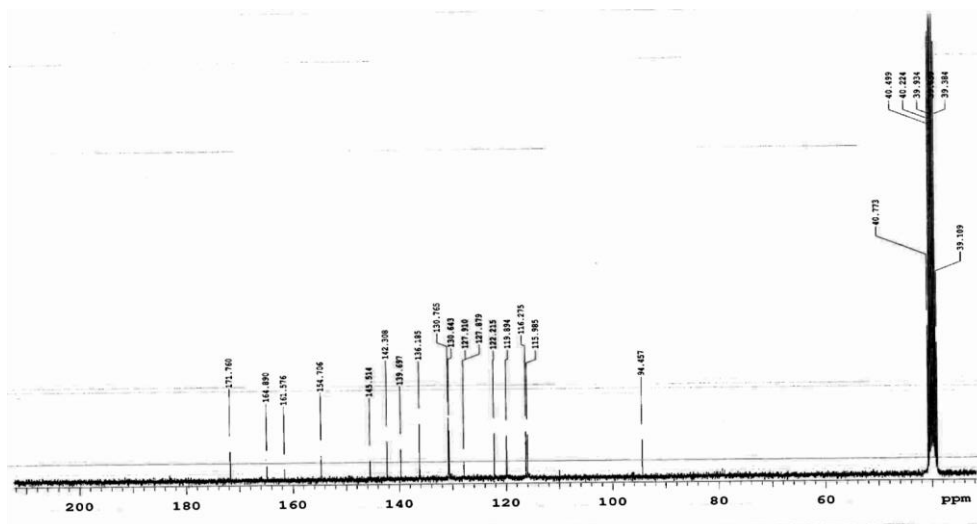

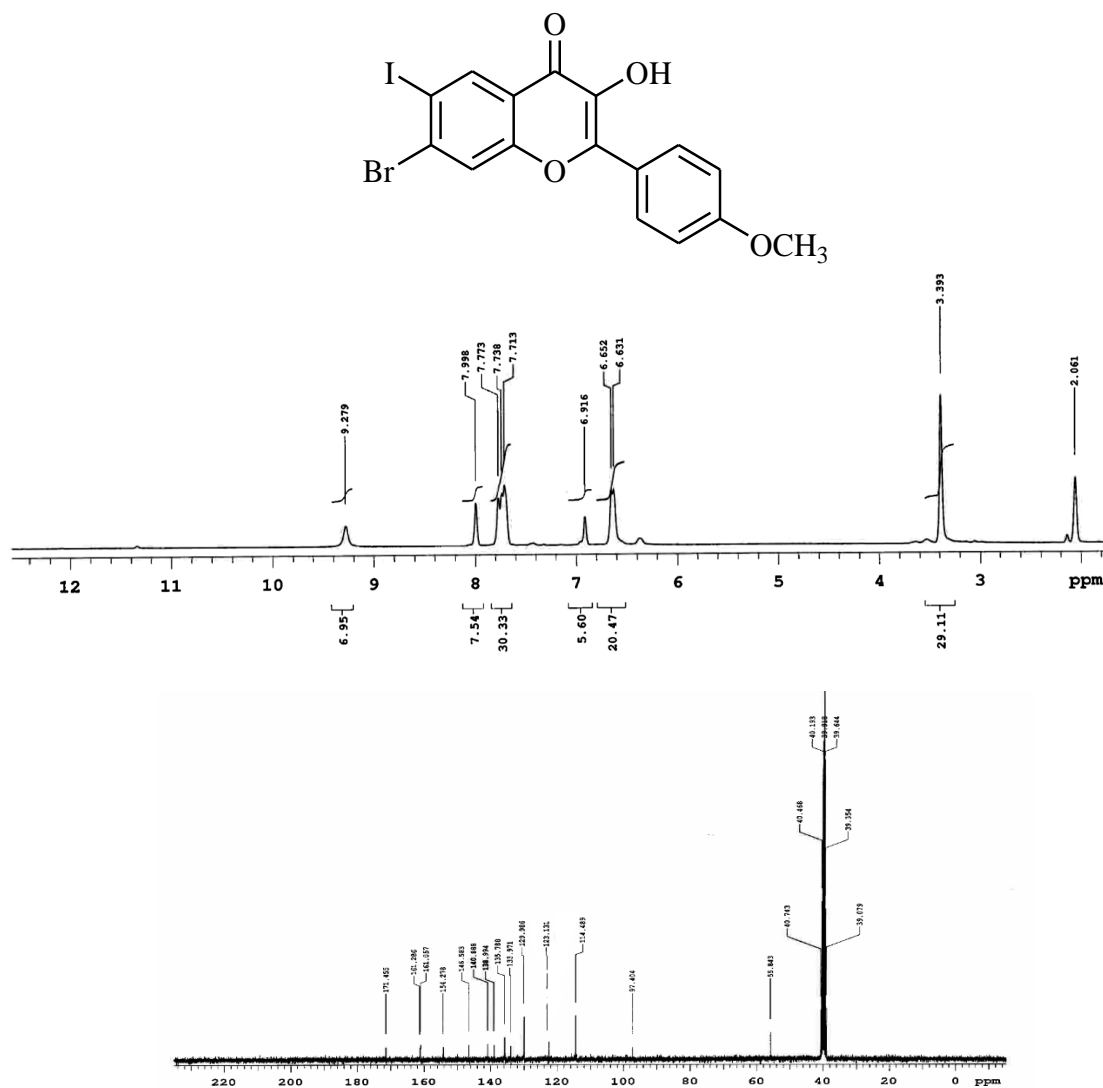

Figure S1.32: <sup>1</sup>H- and <sup>13</sup>C-NMR spectra of **31** in DMSO-*d*<sub>6</sub> at 500 and 125 MHz, respectively.

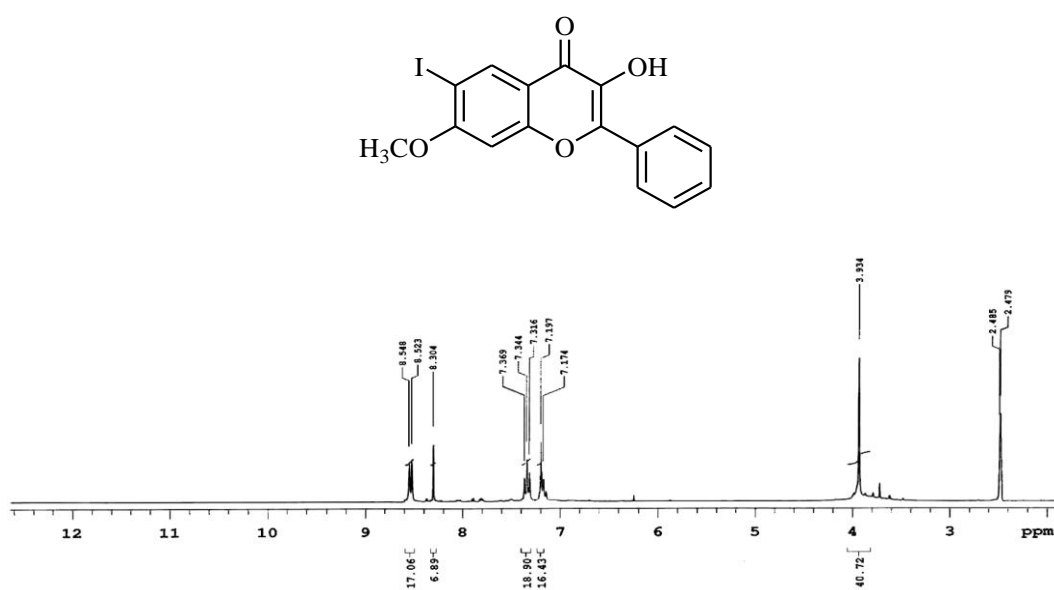

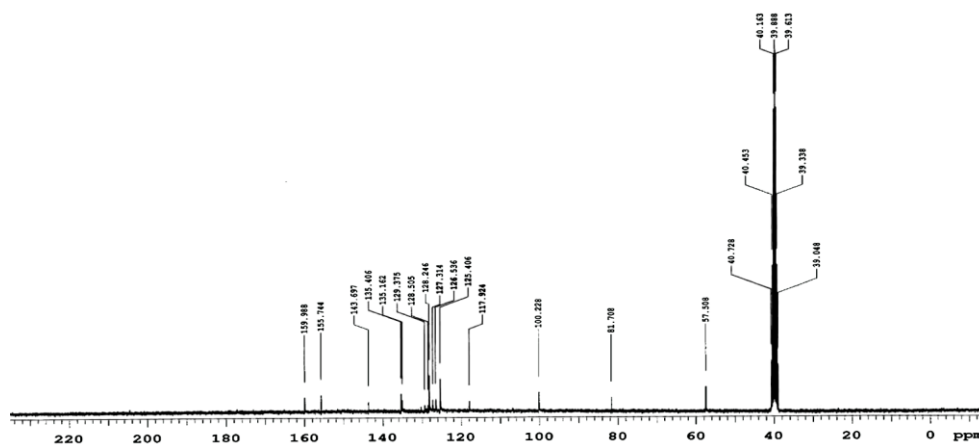

Figure S1.33:  $^1\text{H}$ - and  $^{13}\text{C}$ -NMR spectra of **3m** in  $\text{DMSO-}d_6$  at 500 and 125 MHz, respectively.

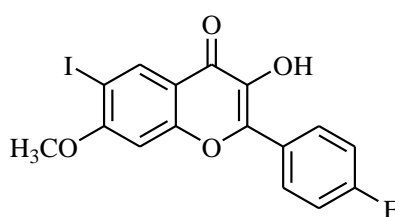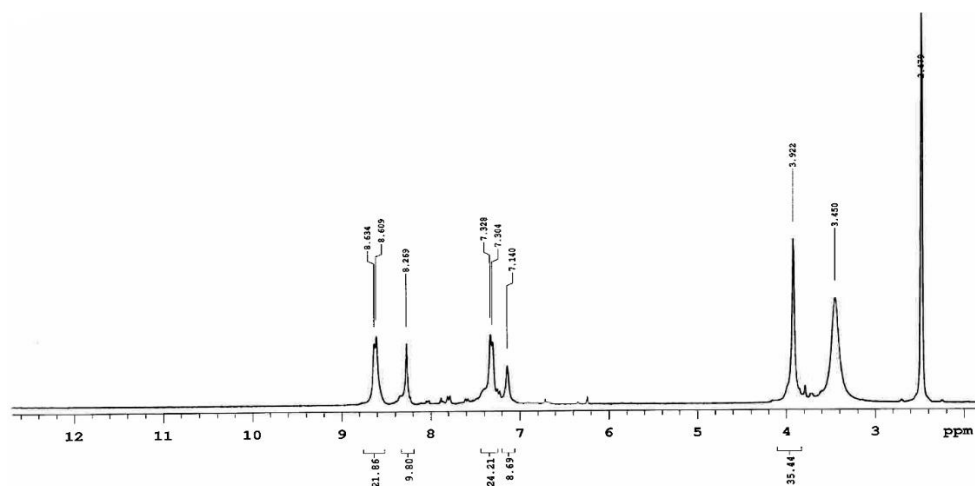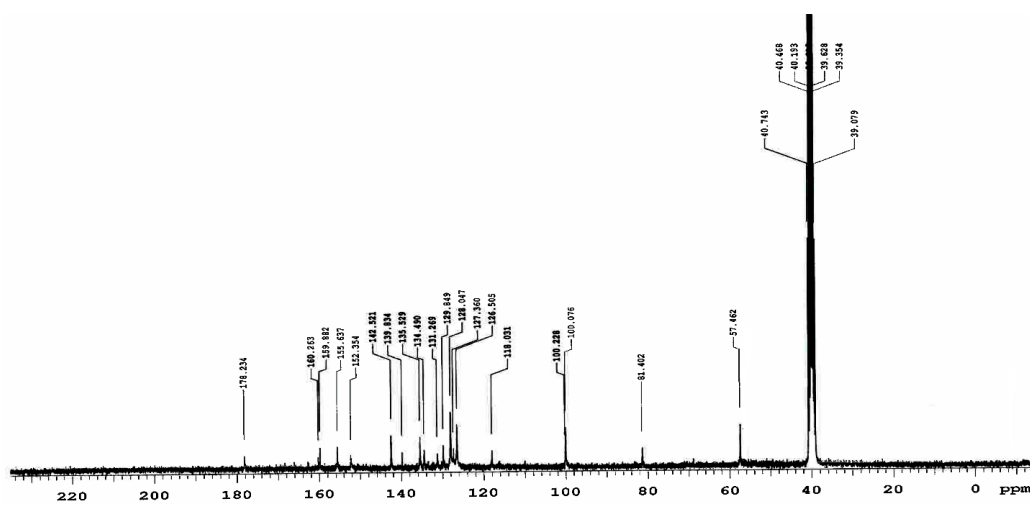

Figure S1.34:  $^1\text{H}$ - and  $^{13}\text{C}$ -NMR spectra of **3n** in  $\text{DMSO-}d_6$  at 500 and 125 MHz, respectively.

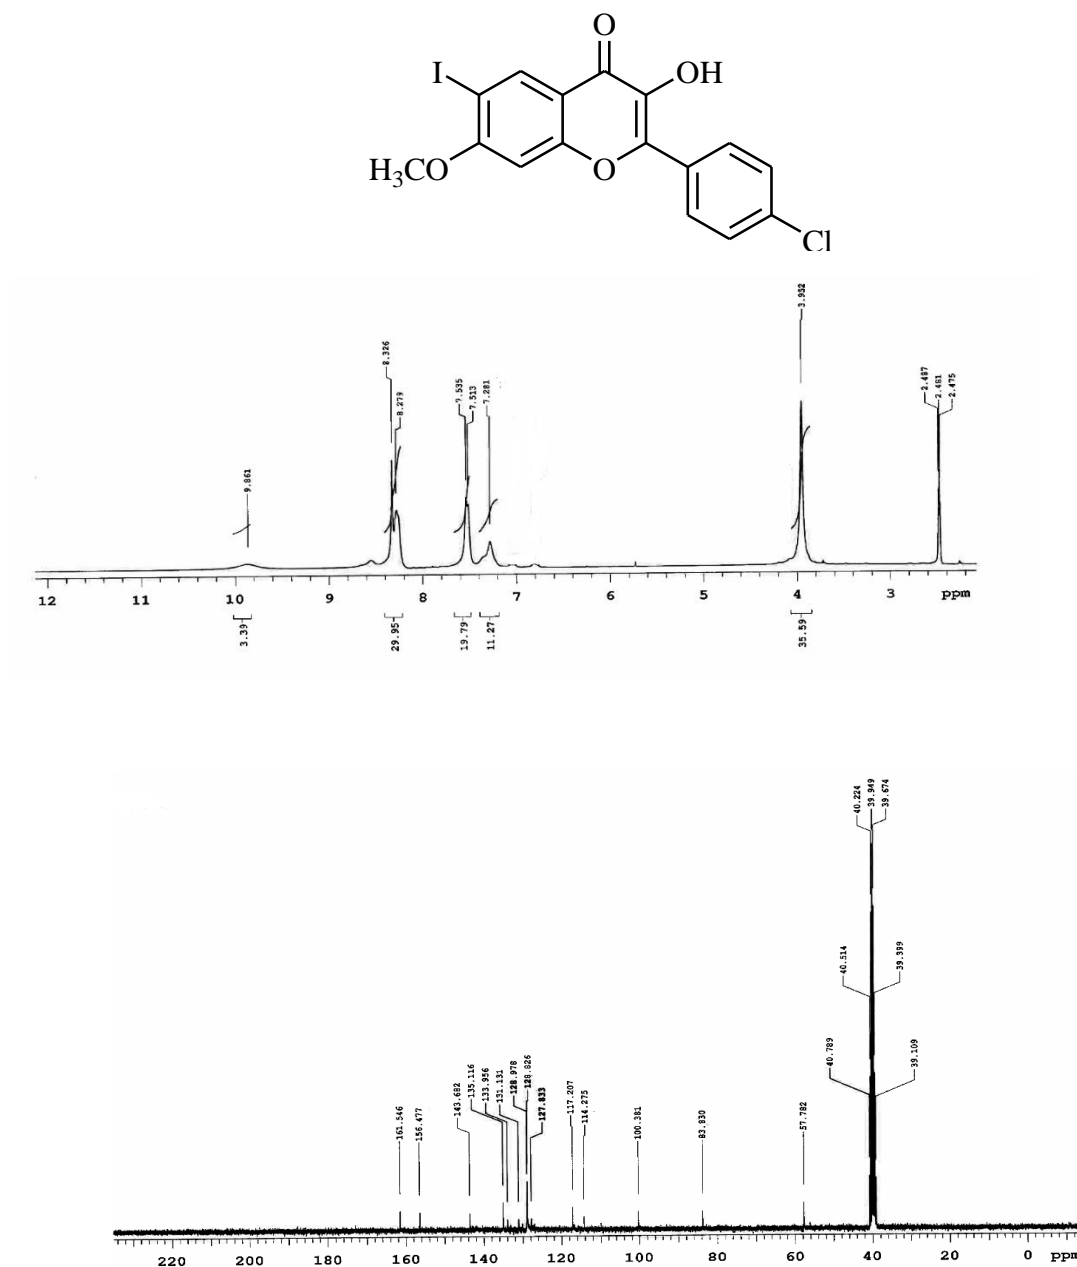

Figure S1.35:  $^1\text{H}$ - and  $^{13}\text{C}$ -NMR spectra of **30** in  $\text{DMSO}-d_6$  at 500 and 125 MHz, respectively.

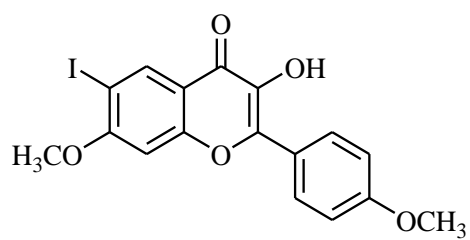

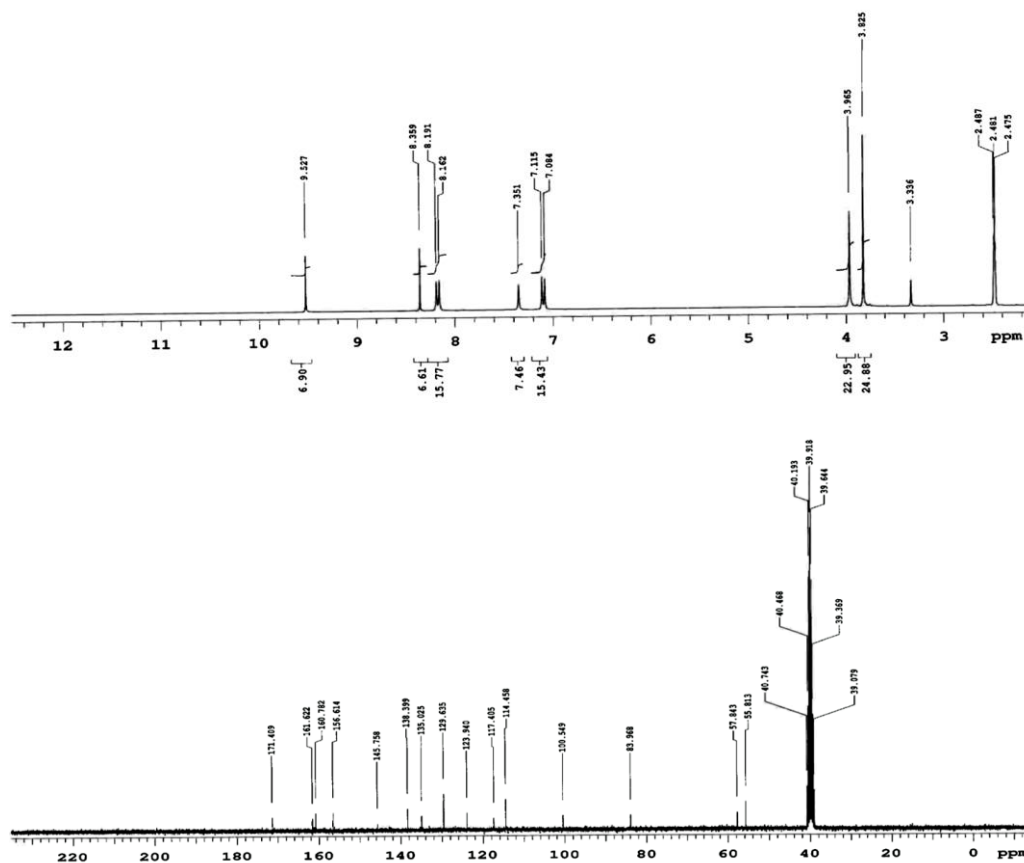

Figure S1.36:  $^1\text{H}$ - and  $^{13}\text{C}$ -NMR spectra of **3p** in  $\text{DMSO-}d_6$  at 500 and 125 MHz, respectively.

Table S1.  $\text{IC}_{50}$  values for BACE-1 inhibitory effect of **2h**, **2j**, **2n**, **2p**, **3b**, **3c**, **3l**, **3p** & quercetin.

| Compound  | BACE-1           |
|-----------|------------------|
| <b>2h</b> | $13.82 \pm 0.03$ |
| <b>2j</b> | $4.703 \pm 0.06$ |
| <b>2n</b> | $25.07 \pm 0.1$  |
| <b>2p</b> | $70.79 \pm 0.2$  |
| <b>3b</b> | $32.18 \pm 0.15$ |
| <b>3c</b> | $19.69 \pm 0.05$ |
| <b>3l</b> | $15.74 \pm 0.12$ |
| <b>3p</b> | $22.44 \pm 0.07$ |
| Quercetin | $12.66 \pm 0.02$ |

Figure S2. Docking poses of compounds **2a–p** and **3a–p** against the active site of AChE.

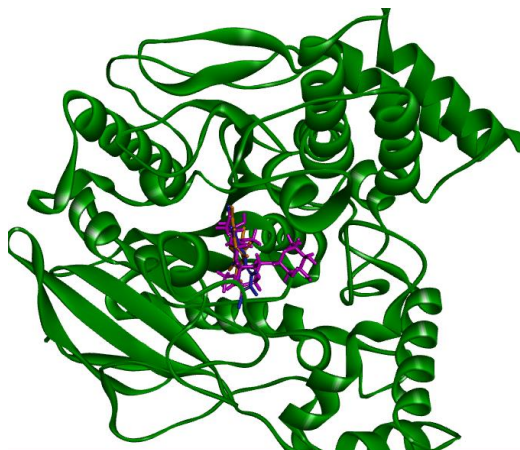



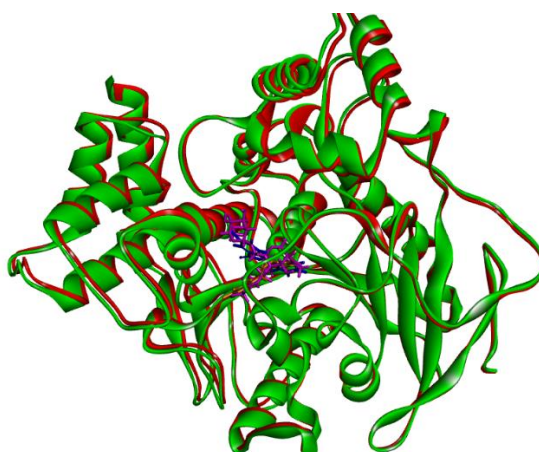

**Figure S2.1.** **1f**, **3b** and donepezil docked into 1e66 (green) and 1GQR (red) to show their positions of docking, Donepezil in purple, **1f** in orange and **3b** in blue. Protein is displayed in green.

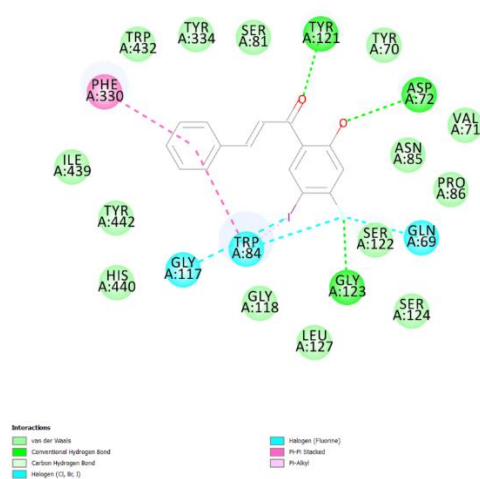

**Figure S2.2.** Docking pose of **2a** into the active site of AChE (PDB 1E66).

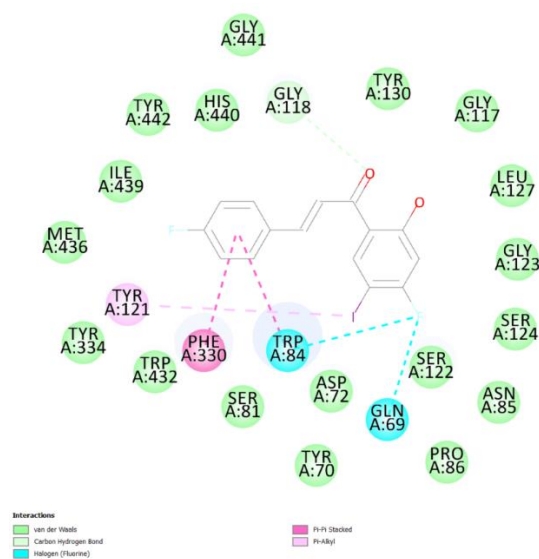

**Figure S2.3.** Docking pose of **2b** into the active site of AChE (PDB 1E66).

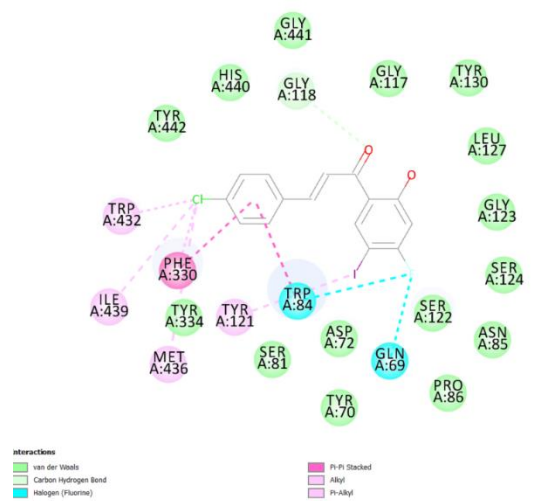

Figure S2.4. Docking pose of 2c into the active site of AChE (PDB 1E66).

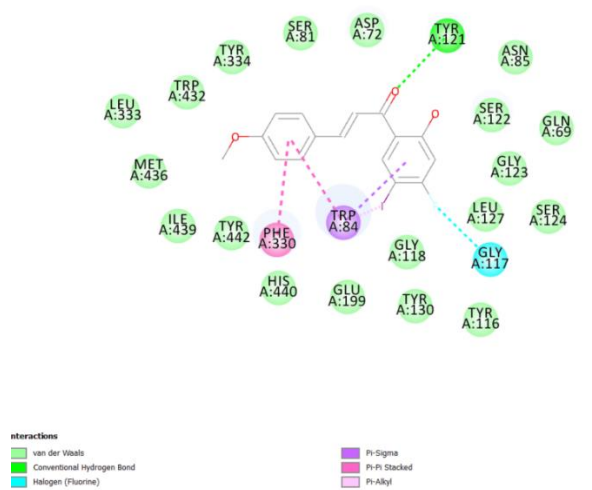

Figure S2.5. Docking pose of 2d into the active site of AChE (PDB 1E66).

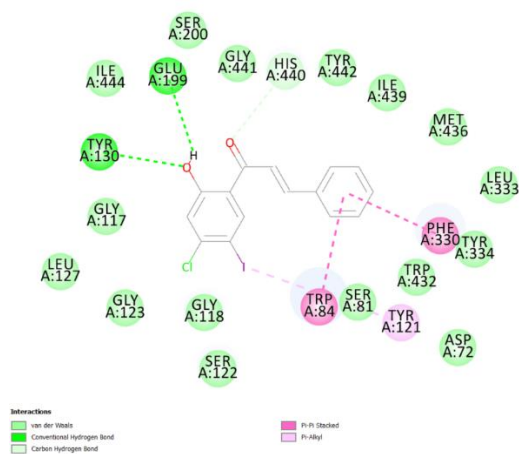

Figure S2.6. Docking pose of 2e into the active site of AChE (PDB 1E66).

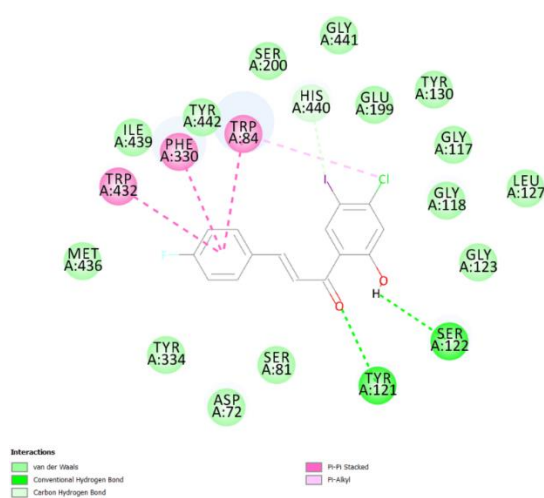

Figure S2.7. Docking pose of 2f into the active site of AChE (PDB 1E66).

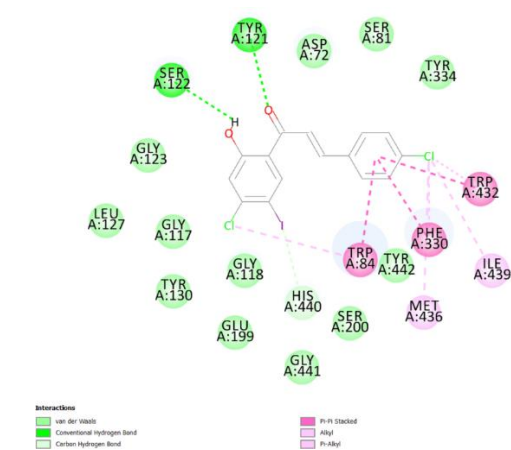

Figure S2.8. Docking pose of 2g into the active site of AChE (PDB 1E66).

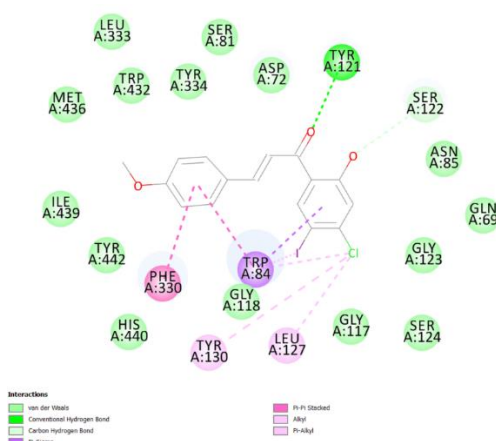

Figure S2.9. Docking pose of **2h** into the active site of AChE (PDB 1E66).

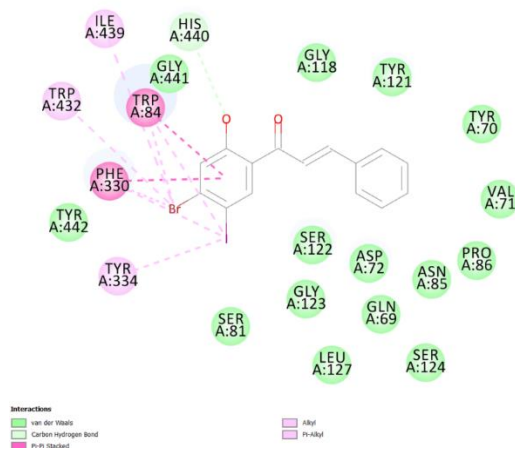

Figure S2.10: Docking pose of **2i** into the active site of AChE (PDB 1E66).

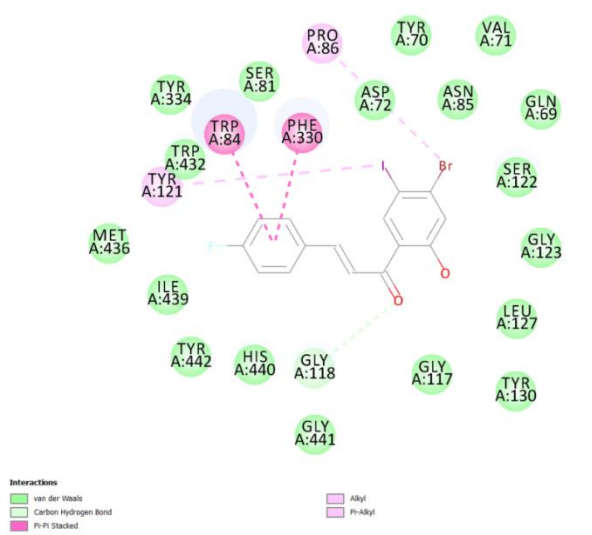

Figure S2.11: Docking pose of **2j** into the active site of AChE (PDB 1E66).

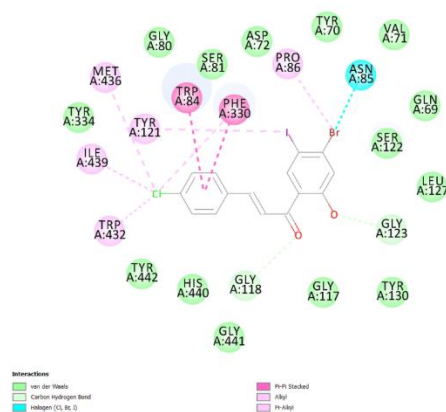

Figure S2.12: Docking pose of **2k** into the active site of AChE (PDB 1E66).

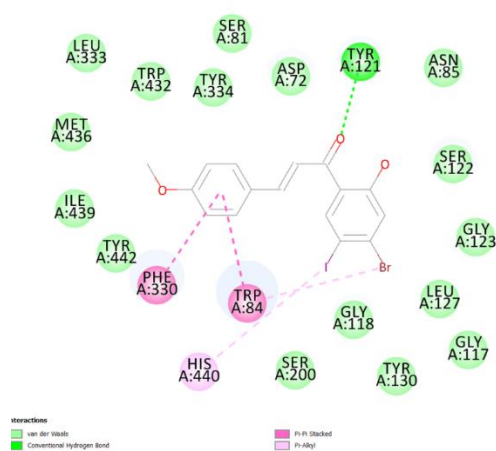

Figure S2.13: Docking pose of **2l** into the active site of AChE (PDB 1E66).

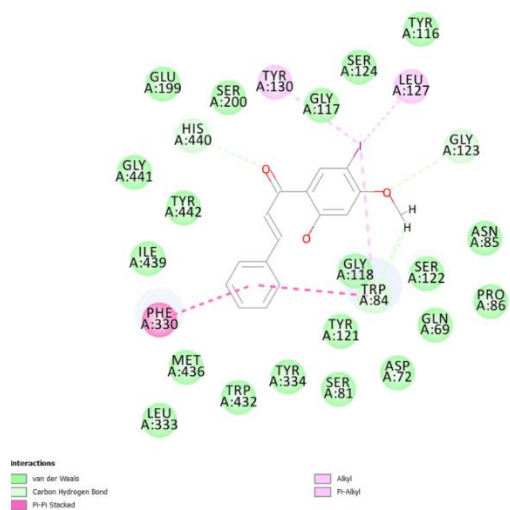

Figure S2.14: Docking pose of **2m** into the active site of AChE (PDB 1E66).

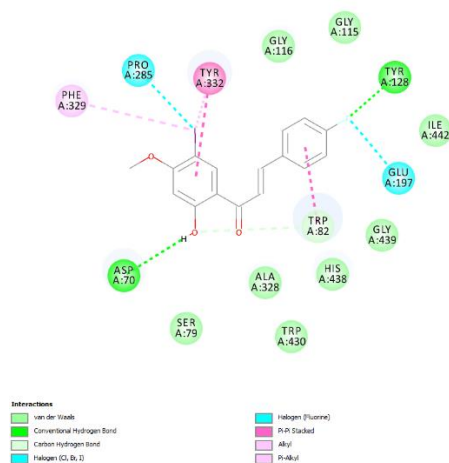

Figure S2.15: Docking pose of **2n** into the active site of AChE (PDB 1E66).

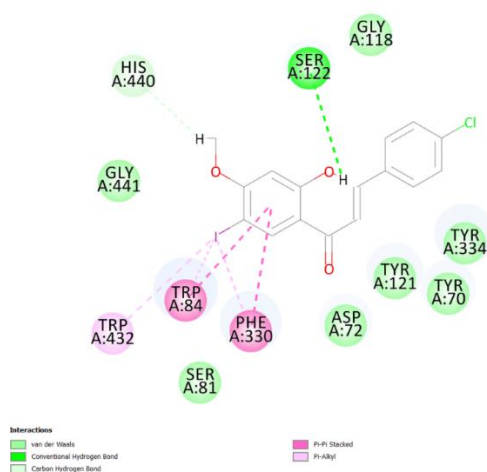

Figure S2.16: Docking pose of **2o** into the active site of AChE (PDB 1E66).

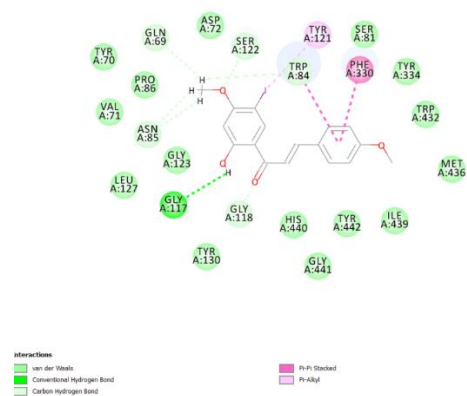

Figure S2.17: Docking pose of **2p** into the active site of AChE (PDB 1E66).

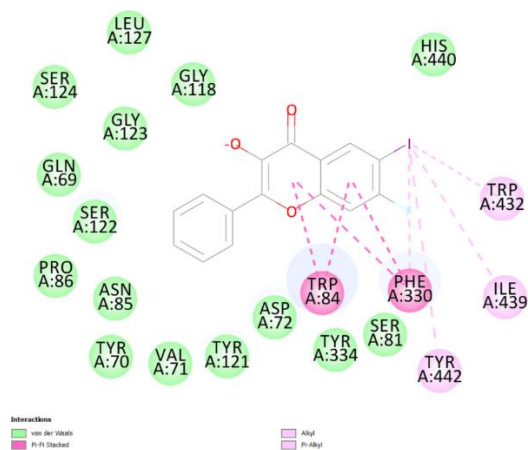

Figure S2.18: Docking pose of **3a** into the active site of AChE (PDB 1E66).

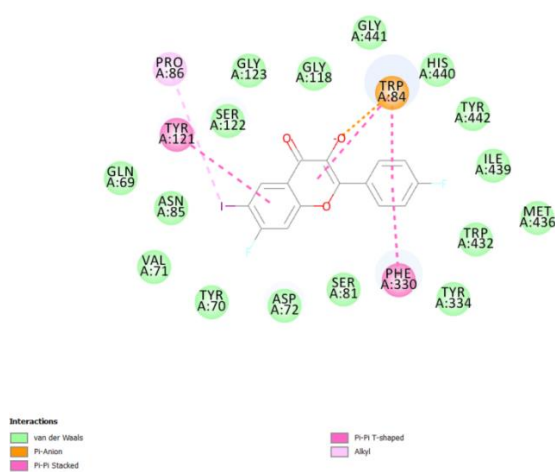

Figure S2.19: Docking pose of **3b** into the active site of AChE (PDB 1E66).

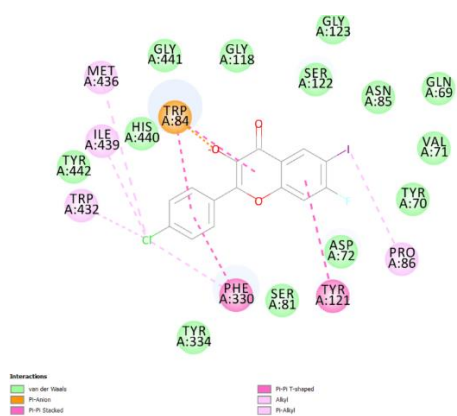

Figure S2.20: Docking pose of **3c** into the active site of AChE (PDB 1E66).

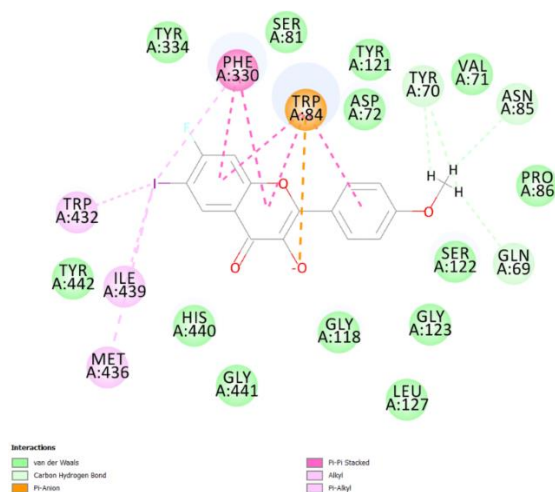

Figure S2.21: Docking pose of 3d into the active site of AChE (PDB 1E66).

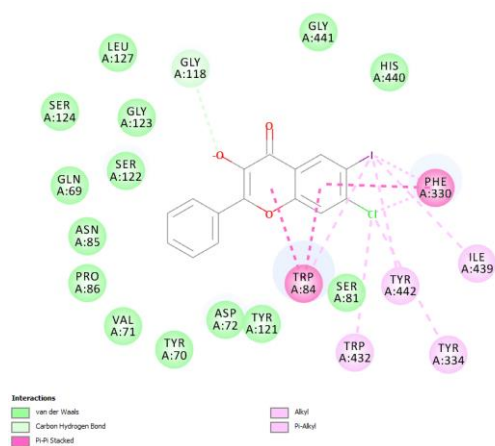

Figure S2.22: Docking pose of 3e into the active site of AChE (PDB 1E66).

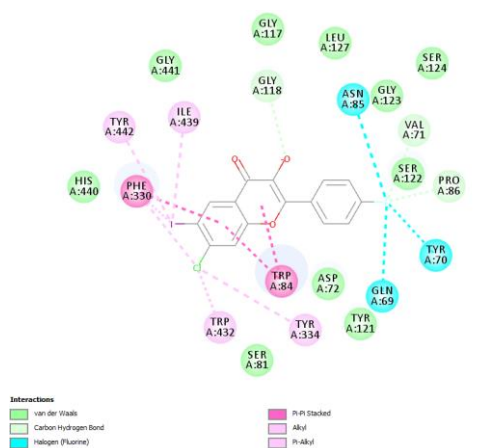

Figure S2.23: Docking pose of 3f into the active site of AChE (PDB 1E66).



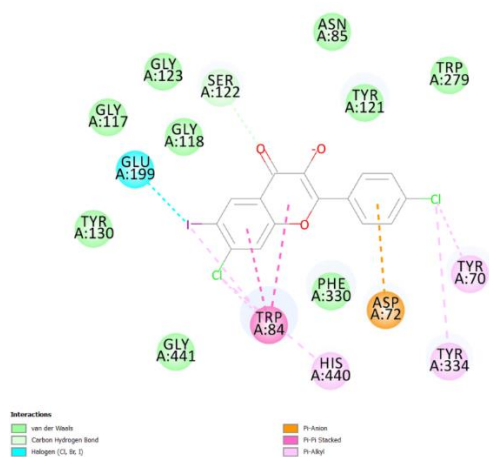

Figure S2.24: Docking pose of **3g** into the active site of AChE (PDB 1E66).

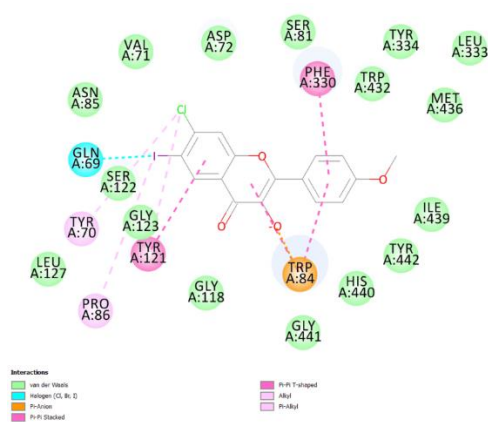

Figure S2.25: Docking pose of **3h** into the active site of AChE (PDB 1E66).

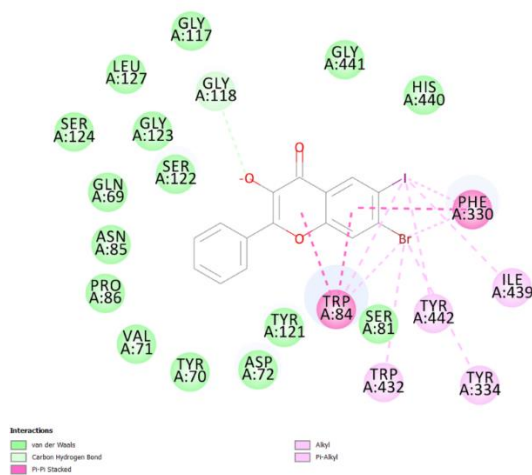

Figure S2.26: Docking pose of **3i** into the active site of AChE (PDB 1E66).

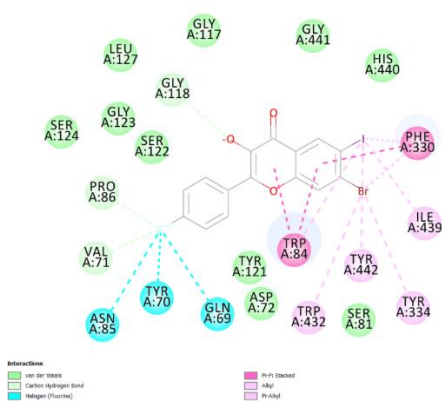

Figure S2.27: Docking pose of **3j** into the active site of AChE (PDB 1E66).

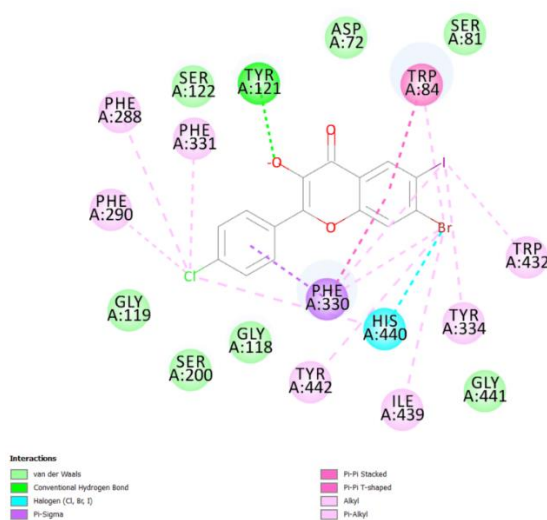

Figure S2.28: Docking pose of **3k** into the active site of AChE (PDB 1E66).

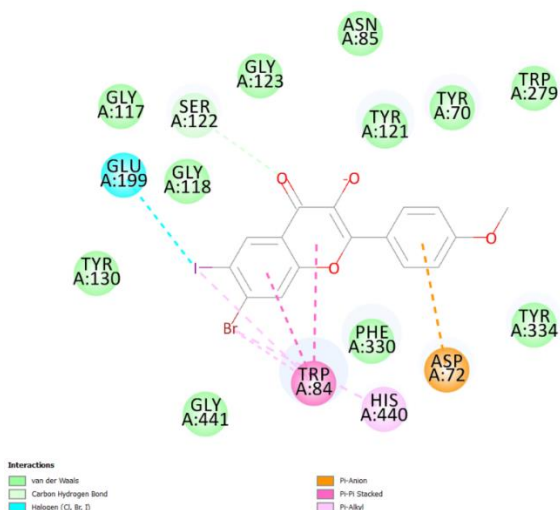

Figure S2.29: Docking pose of **3l** into the active site of AChE (PDB 1E66).

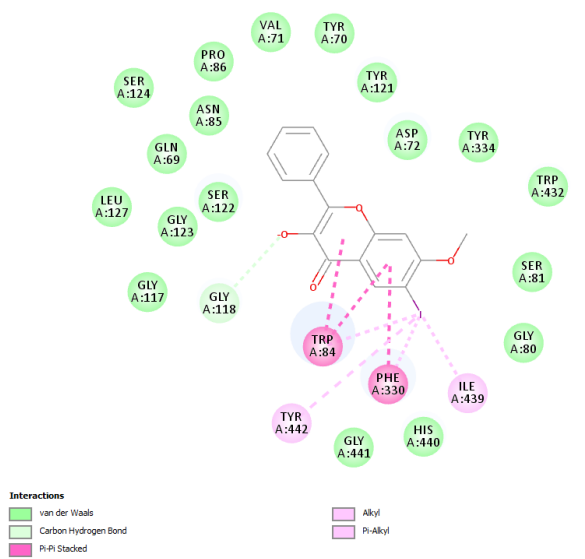

Figure S2.30: Docking pose of 3m into the active site of AChE (PDB 1E66).

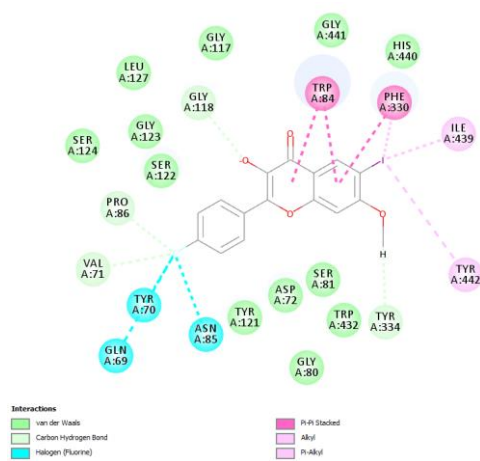

Figure S2.31: Docking pose of 3n into the active site of AChE (PDB 1E66).

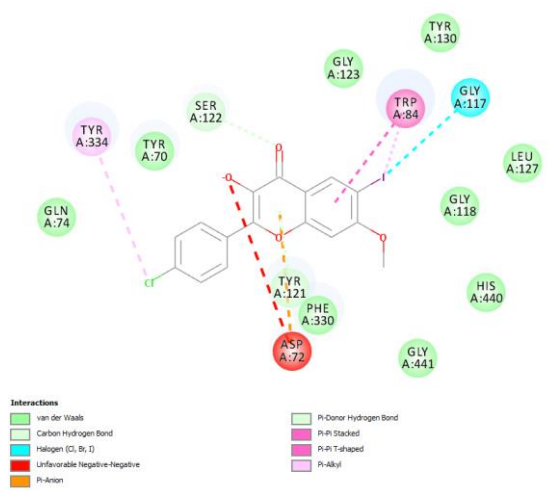

Figure S2.32: Docking pose of 3o into the active site of AChE (PDB 1E66).

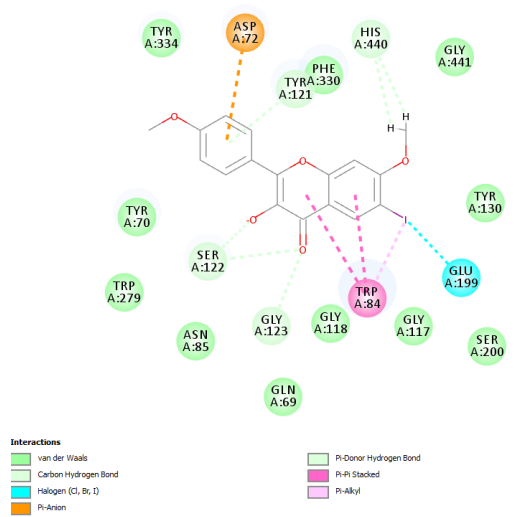

Figure S2.33: Docking pose of 3p into the active site of AChE (PDB 1E66).

Figures S3. Docking poses of compounds 2a–p and 3a–p against the active site of BChE.

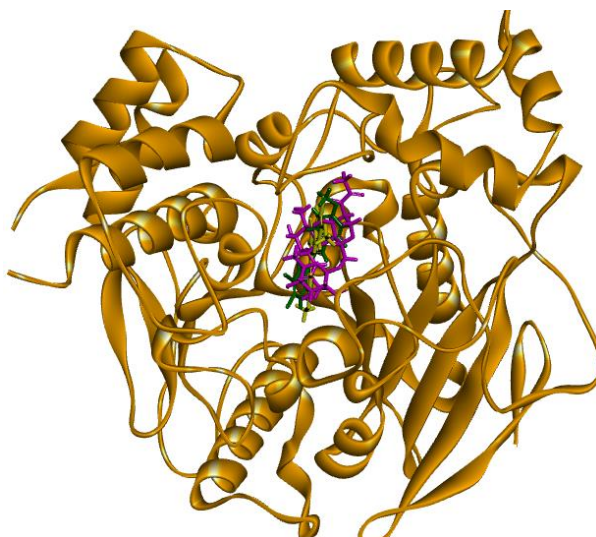

Figure S2.1. 2h, 3p and donepezil docked into 1P0I to show their positions of docking.

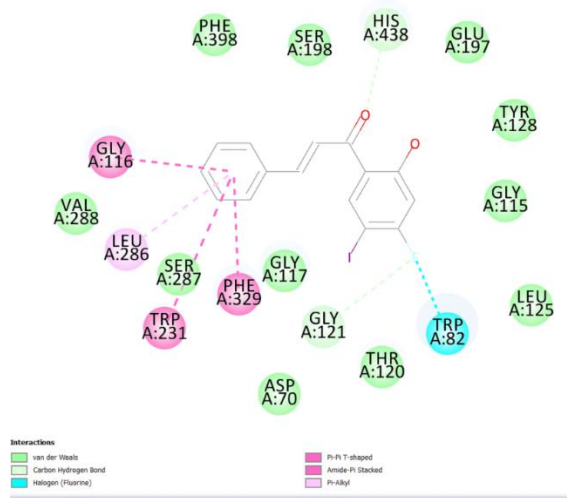

Figure S3.2. Docking pose of 2a into the active site of BChE (PDB 1P0I).

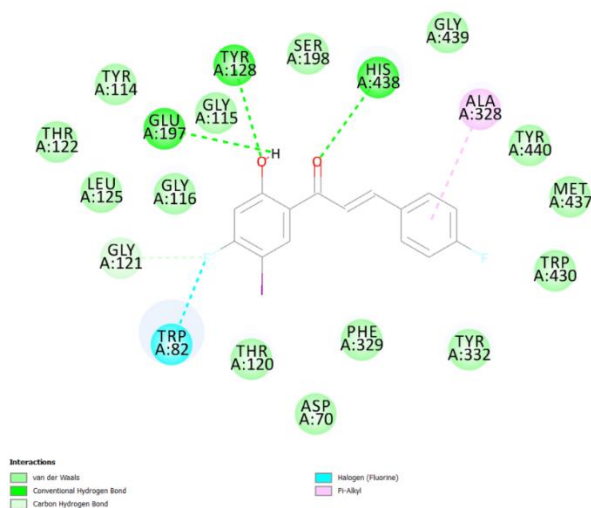

Figure S3.3. Docking pose of **2b** into the active site of BChE (PDB 1P0I).

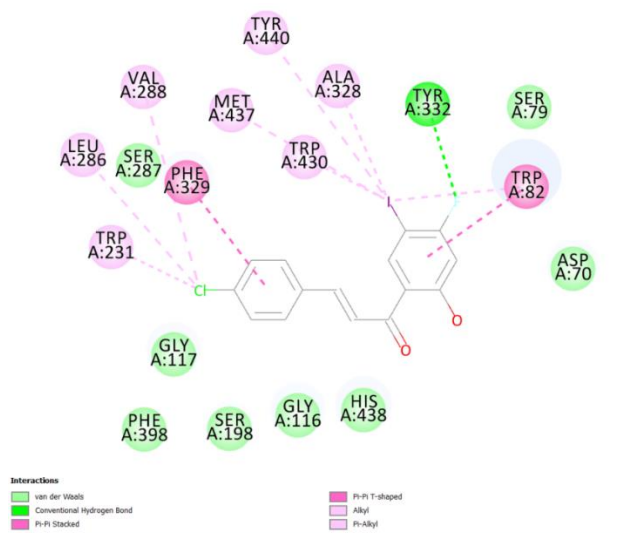

Figure S3.4. Docking pose of **2c** into the active site of BChE (PDB 1P0I).

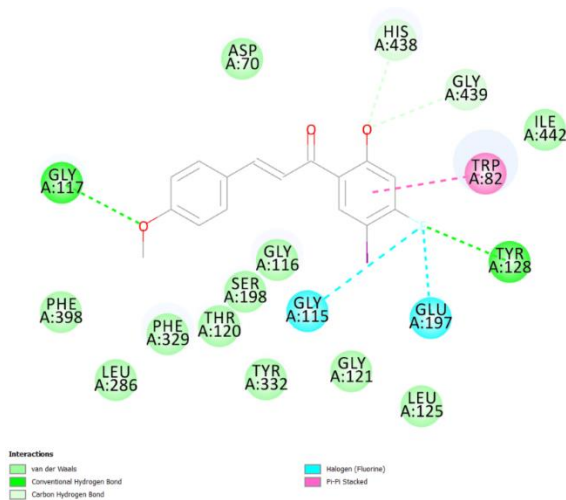

Figure S3.5. Docking pose of **2d** into the active site of BChE (PDB 1P0I).

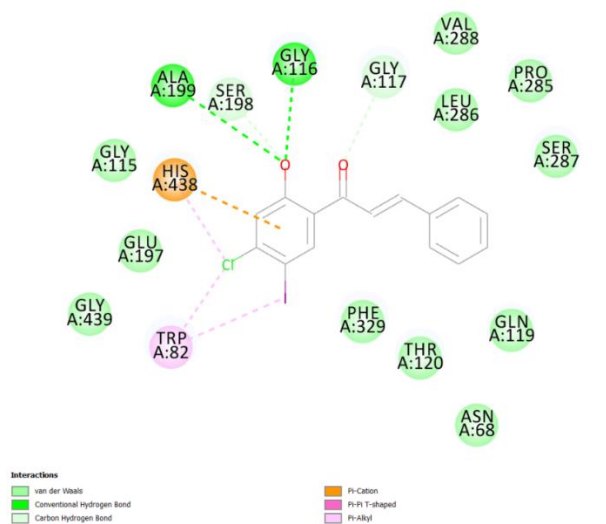

Figure S3.6. Docking pose of 2e into the active site of BChE (PDB 1POI).

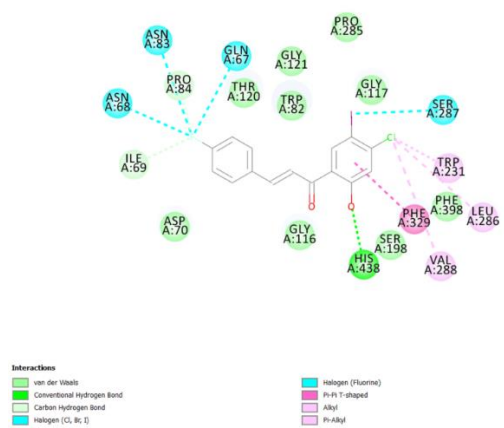

Figure S3.7. Docking pose of 2f into the active site of BChE (PDB 1POI).

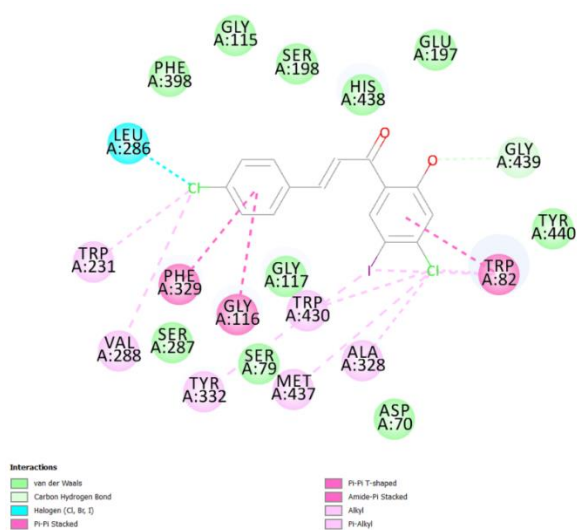

Figure S3.8. Docking pose of 2g into the active site of BChE (PDB 1POI).

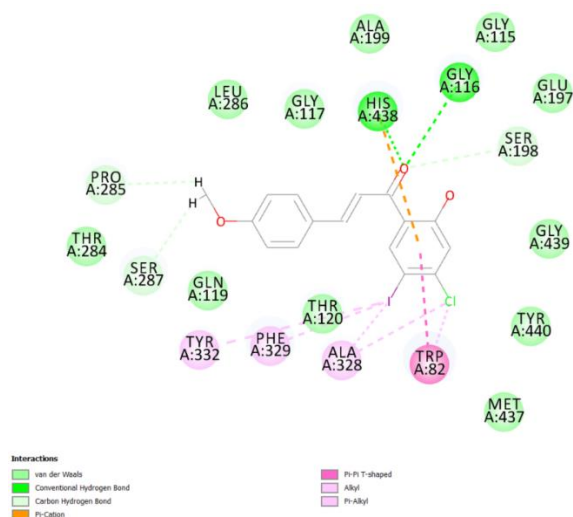

Figure S3.9. Docking pose of **2h** into the active site of BChE (PDB 1P0I).

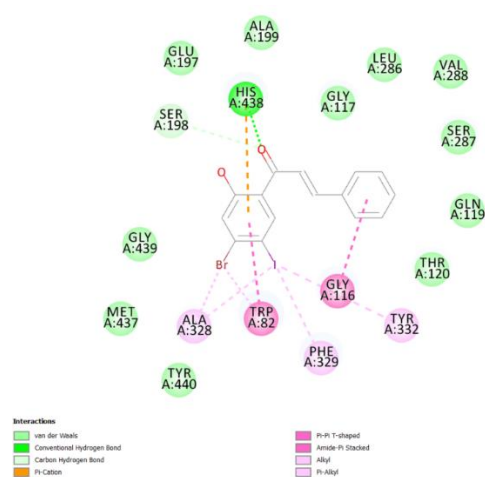

Figure S3.10: Docking pose of **2i** into the active site of BChE (PDB 1P0I).1P0I.

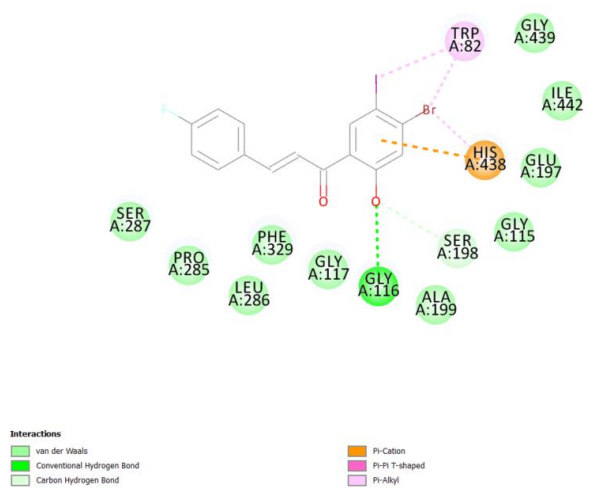

Figure S3.11: Docking pose of **2j** into the active site of BChE (PDB 1P0I).



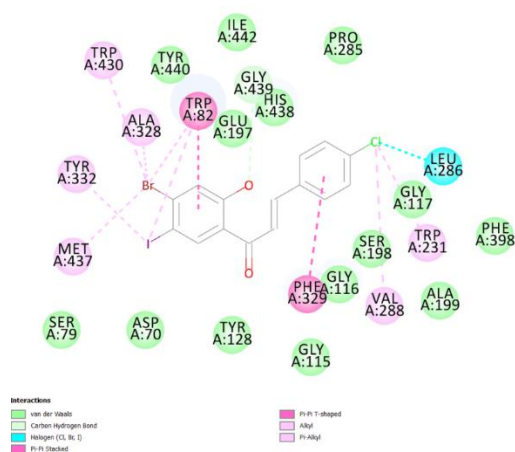

Figure S3.12: Docking pose of **2k** into the active site of BChE (PDB 1P0I).

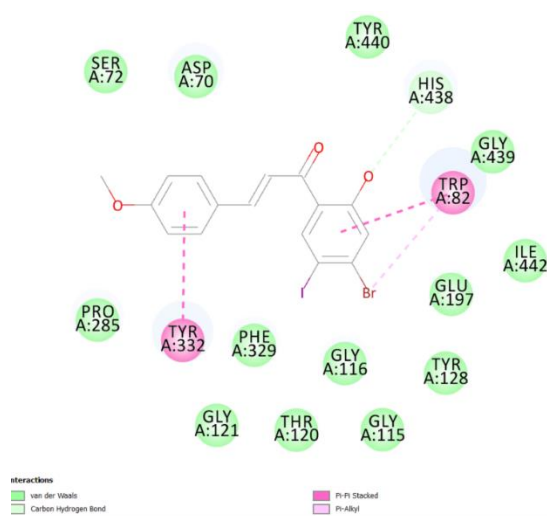

Figure S3.13: Docking pose of **2l** into the active site of BChE (PDB 1P0I).

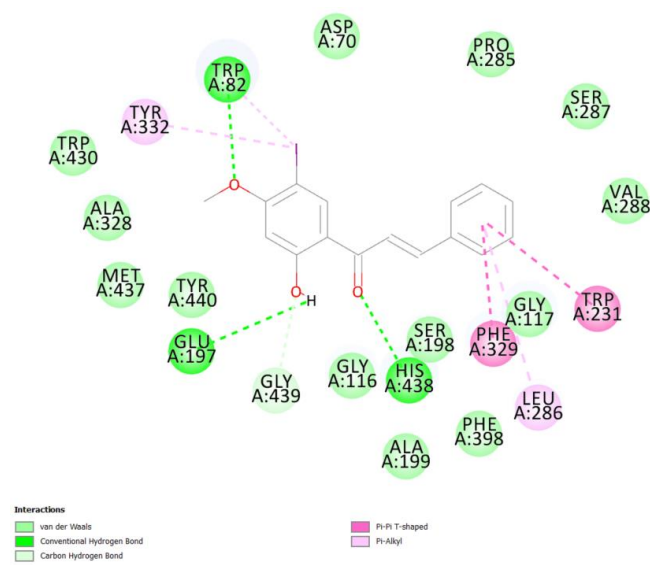

Figure S3.14: Docking pose of **2m** into the active site of BChE (PDB 1P0I).



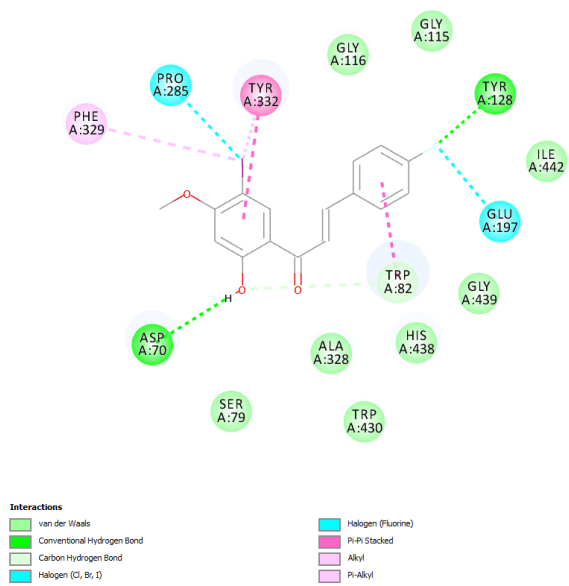

Figure S3.15: Docking pose of 2n into the active site of BChE (PDB 1P0I).

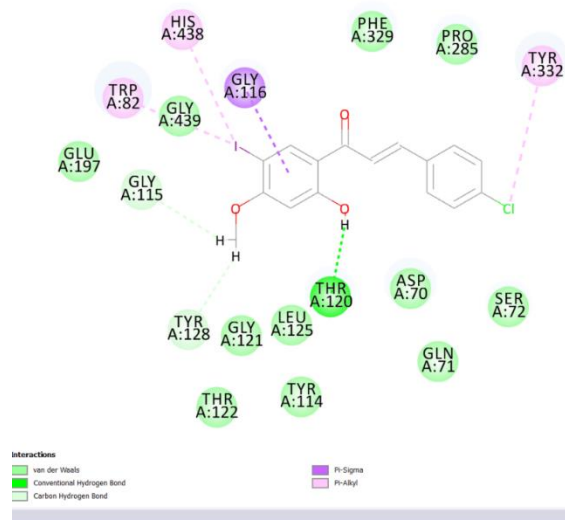

Figure S3.16: Docking pose of 2o into the active site of BChE (PDB 1P0I).

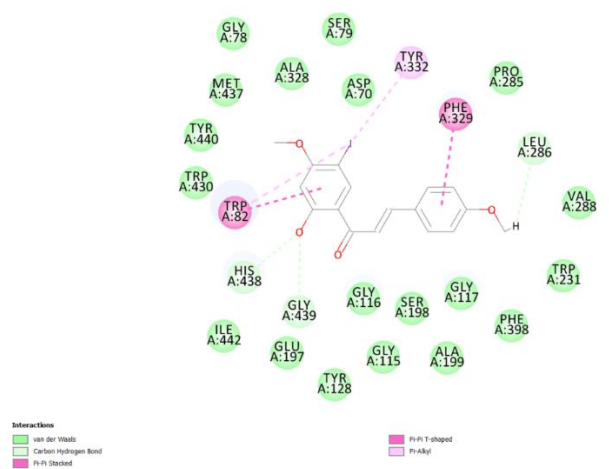

Figure S3.17: Docking pose of 2p into the active site of BChE (PDB 1P0I).

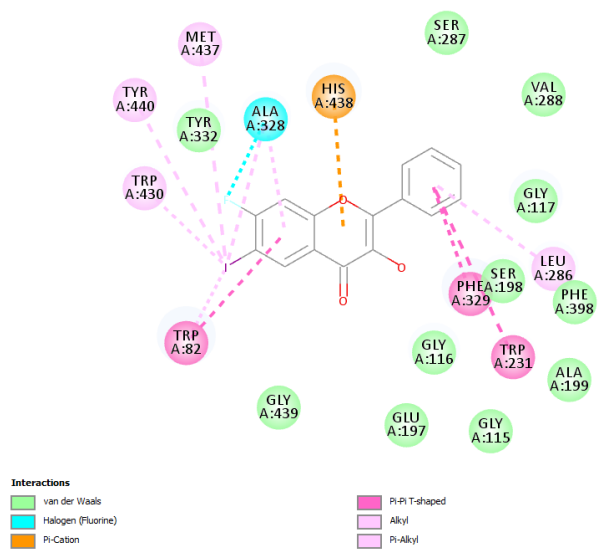

Figure S3.18: Docking pose of 3a into the active site of BChE (PDB 1P0I).

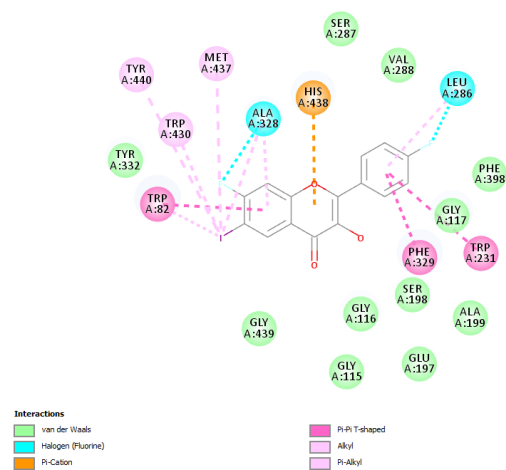

Figure S3.19: Docking pose of 3b into the active site of BChE (PDB 1P0I).

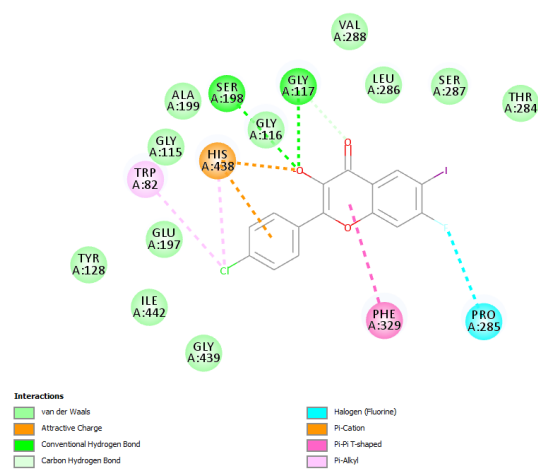

Figure S3.20: Docking pose of 3c into the active site of BChE (PDB 1P0I).

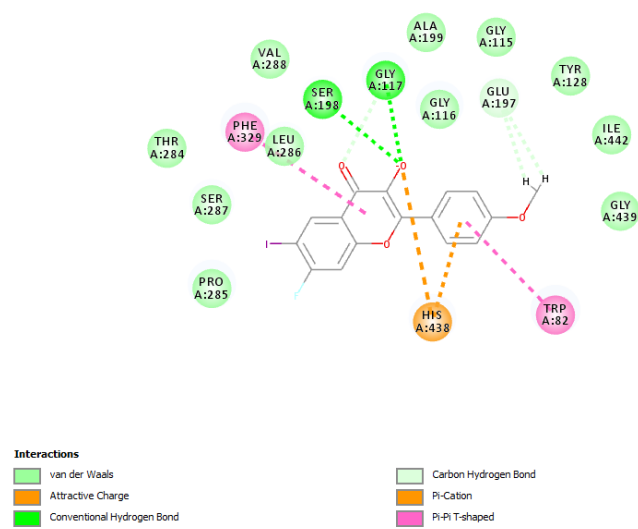

Figure S3.21: Docking pose of **3d** into the active site of BChE (PDB 1P0I).

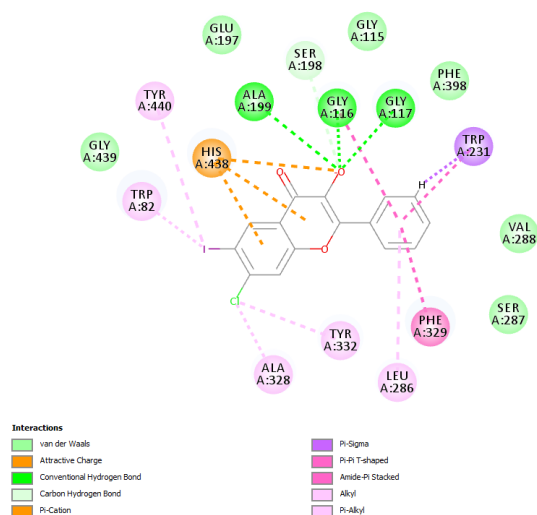

Figure S3.22: Docking pose of **3e** into the active site of BChE (PDB 1P0I).

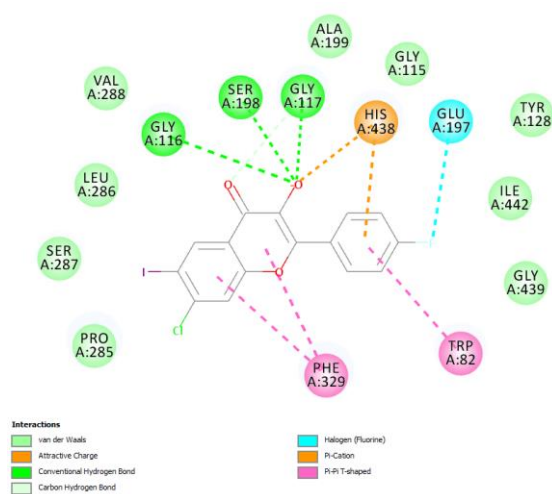

Figure S3.23: Docking pose of **3f** into the active site of BChE (PDB 1P0I).

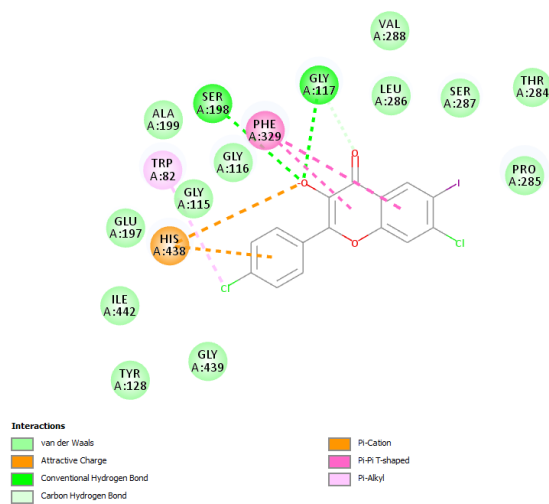

Figure S3.24: Docking pose of **3g** into the active site of BChE (PDB 1P0I).

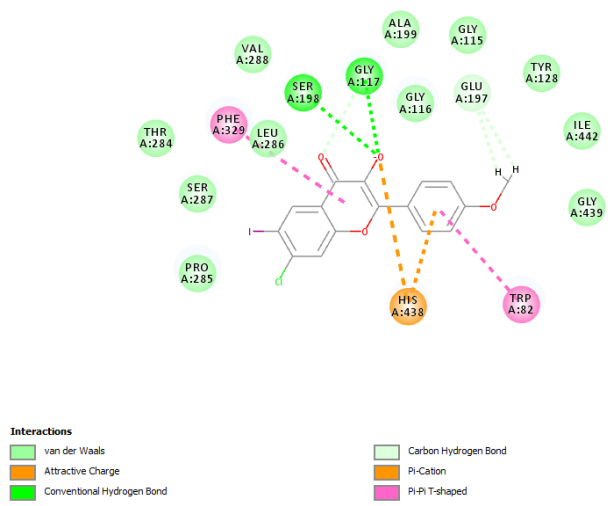

Figure S3.25: Docking pose of **3h** into the active site of BChE (PDB 1P0I).

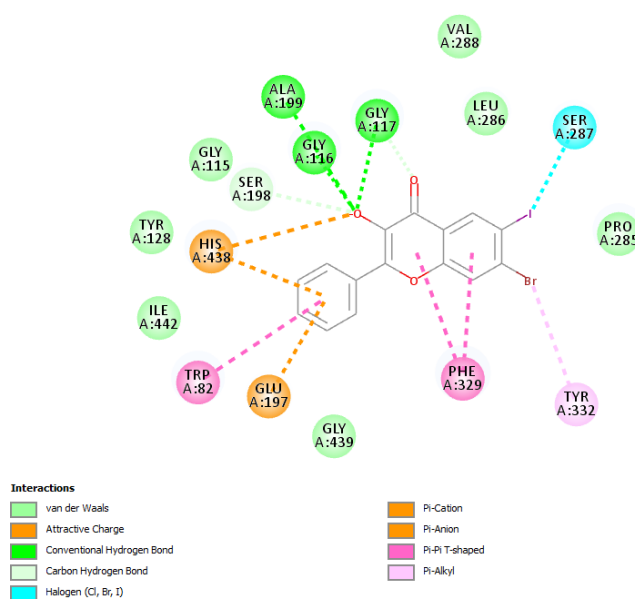

Figure S3.26: Docking pose of **3i** into the active site of BChE (PDB 1P0I).

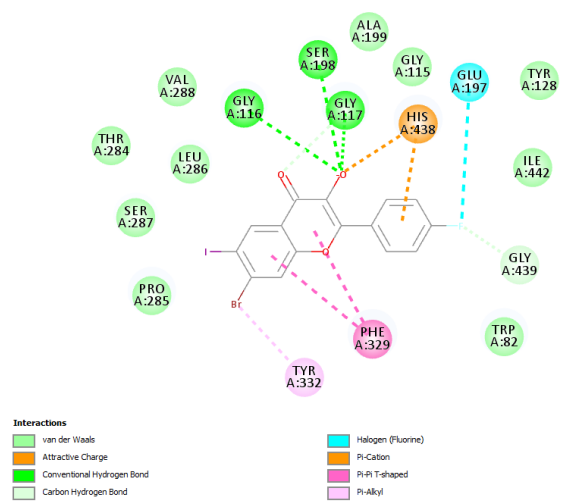

Figure S3.27: Docking pose of **3j** into the active site of BChE (PDB 1P0I).

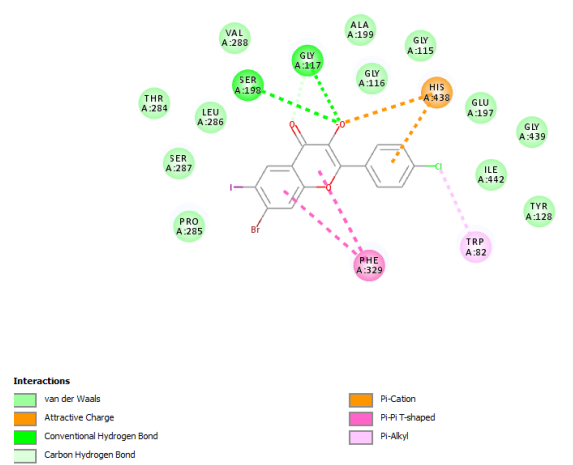

Figure S3.28: Docking pose of **3k** into the active site of BChE (PDB 1P0I).

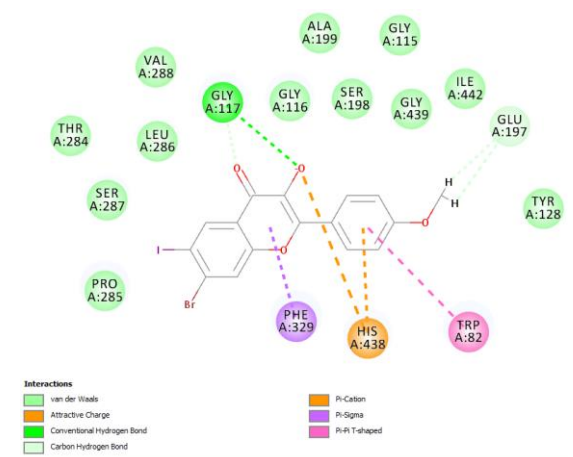

Figure S3.29: Docking pose of **3l** into the active site of BChE (PDB 1P0I).

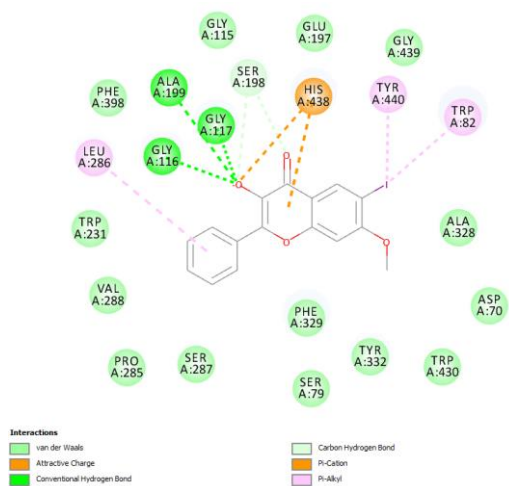

Figure S3.30: Docking pose of **3m** into the active site of BChE (PDB 1P0I).

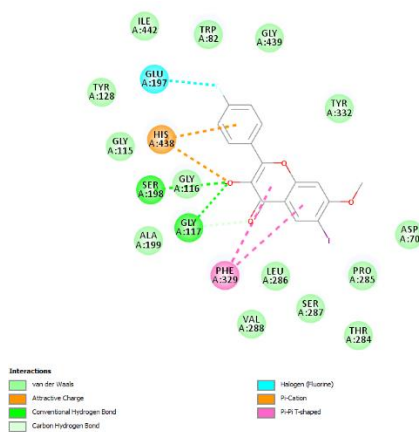

Figure S3.31: Docking pose of **3n** into the active site of BChE (PDB 1P0I).

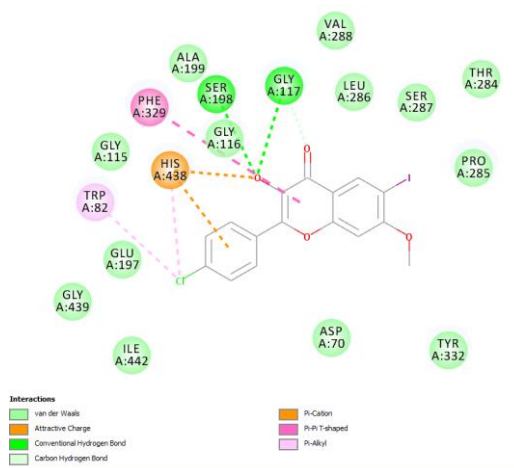

Figure S3.32: Docking pose of **3o** into the active site of BChE (PDB 1P0I).

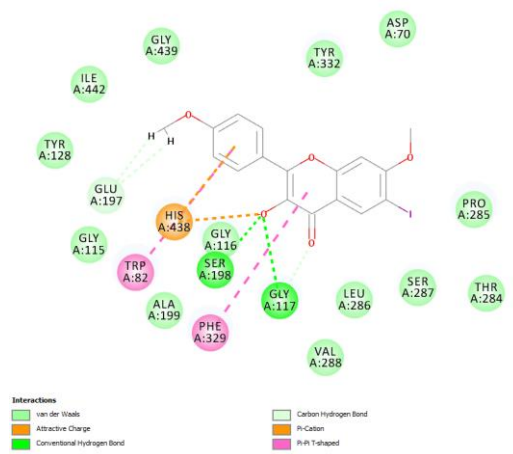

Figure S3.33: Docking pose of **3p** into the active site of BChE (PDB 1P0I).

Figure S4. Docking poses of **2n**, **2p**, **3b** and **3p** into BACE-1.

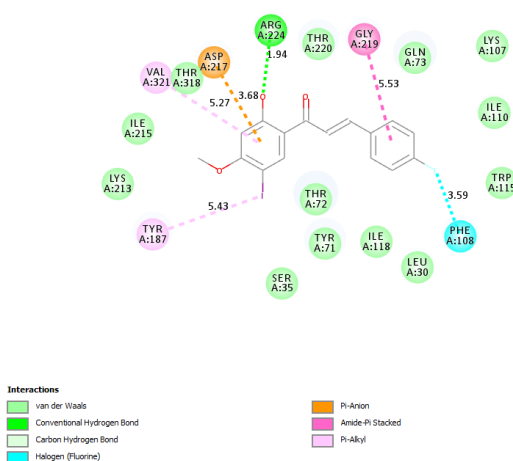

Figure S4.1. Docking pose of **2n** into BACE-1 (PDB code: 4D8C).

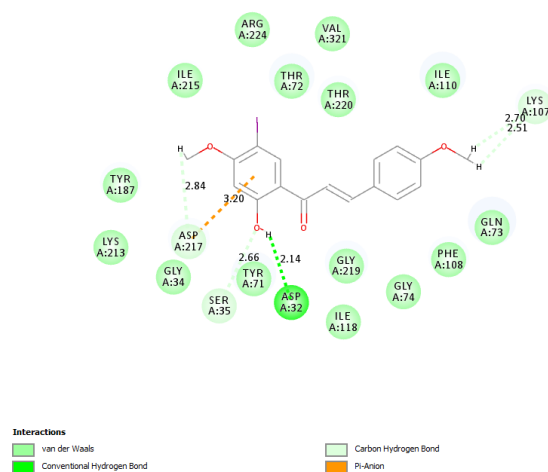

Figure S4.2. Docking pose of **2p** into BACE-1 (PDB code: 4D8C).

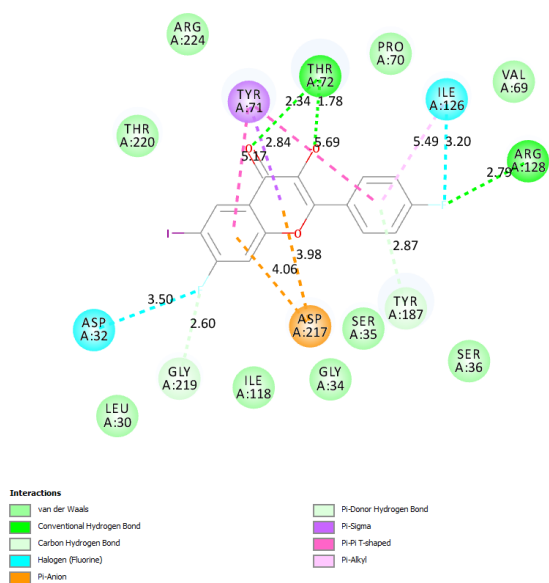

Figure S4.3. Docking pose of **3b** into BACE-1 (PDB code: 4D8C)

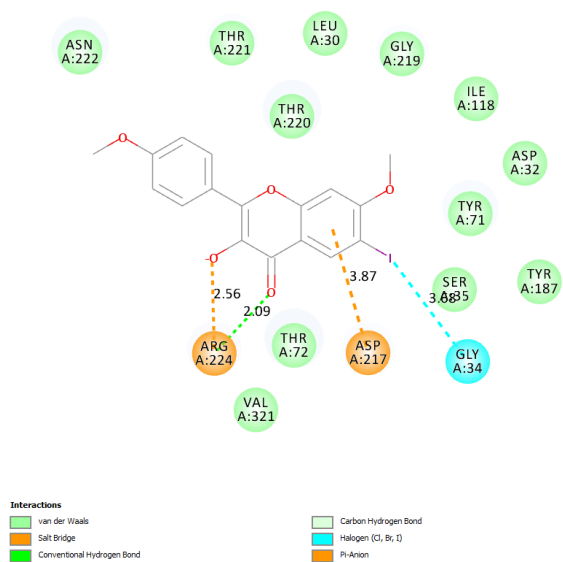

Figure S4.4. Docking pose of **3p** into BACE-1 (PDB code: 4D8C).
